# 1 The Dynamics of Error Processing in the Human Brain 2 as Reflected by High-Gamma Activity in Noninvasive 3 and Intracranial EEG

4 **Abbreviated title:** High-Gamma Activity in Human Error Processing

5 **Martin Völker**<sup>1,2,3,4</sup>, **Lukas D.J. Fiederer**<sup>1,4,5,6\*</sup>, **Sofie Berberich**<sup>1,7\*</sup>, **Jiří Hammer**<sup>1,4,8\*</sup>, **Joos Behncke**<sup>1,3,4</sup>, **Pavel**  
6 **Kršek**<sup>8</sup>, **Martin Tomášek**<sup>8</sup>, **Petr Marusič**<sup>8</sup>, **Peter C. Reinacher**<sup>7,9</sup>, **Volker A. Coenen**<sup>7,9</sup>, **Moritz Helias**<sup>10</sup>, **Andreas**  
7 **Schulze-Bonhage**<sup>4,7,11</sup>, **Wolfram Burgard**<sup>3,4,12</sup> and **Tonio Ball**<sup>1,4,6,7</sup>

8 *1 - Translational Neurotechnology Lab, Medical Center – University of Freiburg, 79106 Freiburg, Germany*

9 *2 - Graduate School of Robotics, University of Freiburg, 79106 Freiburg, Germany*

10 *3 - Department of Computer Science, University of Freiburg, 79110 Freiburg, Germany*

11 *4 - BrainLinks-BrainTools, University of Freiburg, 79110 Freiburg, Germany*

12 *5 - Faculty of Biology, University of Freiburg, 79104 Freiburg, Germany*

13 *6 - Bernstein Center, University of Freiburg, 79104 Freiburg, Germany*

14 *7 - Faculty of Medicine, University of Freiburg, 79106 Freiburg, Germany*

15 *8 - Charles University, Second Faculty of Medicine, Motol University Hospital, 15006 Prague, Czech Republic*

16 *9 - Stereotactic and Functional Neurosurgery, Medical Center – University of Freiburg, 79106 Freiburg, Germany*

17 *10 - Institute of Neuroscience and Medicine (INM-6) and Institute for Advanced Simulation (IAS-6), Jülich Research*

18 *Centre and JARA, 52428 Jülich, Germany*

19 *11 - Epilepsy Center, Medical Center – University of Freiburg, 79106 Freiburg, Germany*

20 *12 - Autonomous Intelligent Systems, University of Freiburg, 79110 Freiburg, Germany*

21 *\* These authors contributed equally to this work.*

22 **Corresponding author:** Martin Völker, Translational Neurotechnology Lab, Engelbergerstr. 21, 79106

23 Freiburg, Germany, email [martin.voelker@uniklinik-freiburg.de](mailto:martin.voelker@uniklinik-freiburg.de)

24 Number of pages: 48

25 Number of figures: 12

26 Number of tables: 2

27 Number of words in Abstract: 246

28 Number of words in Introduction: 654

29 Number of words in Discussion: 2378

30 **Conflict of Interest:** The authors declare no competing financial interests.

31 **Acknowledgements:** This work was supported by DFG grant EXC1086 BrainLinks-BrainTools, Baden-  
32 Württemberg Stiftung grant BMI-Bot, Graduate School of Robotics in Freiburg, Germany and the State  
33 Graduate Funding Program of Baden-Württemberg, Germany.

## 34 **Abstract**

35 Error detection in motor behavior is a fundamental cognitive function heavily relying on  
36 cortical information processing. Neural activity in the high-gamma frequency band (HGB)  
37 closely reflects such local cortical processing, but little is known about its role in error  
38 processing, particularly in the healthy human brain. Here we characterize the  
39 error-related response of the human brain based on data obtained with noninvasive  
40 EEG optimized for HGB mapping in 31 healthy subjects (15 females, 16 males), and  
41 additional intracranial EEG data from 9 epilepsy patients (4 females, 5 males). Our  
42 findings reveal a comprehensive picture of the global and local dynamics of error-related  
43 HGB activity in the human brain. On the global level as reflected in the noninvasive  
44 EEG, the error-related response started with an early component dominated by anterior  
45 brain regions, followed by a shift to parietal regions, and a subsequent phase  
46 characterized by sustained parietal HGB activity. This phase lasted for more than 1 s  
47 after the error onset. On the local level reflected in the intracranial EEG, a cascade of  
48 both transient and sustained error-related responses involved an even more extended  
49 network, spanning beyond frontal and parietal regions to the insula and the  
50 hippocampus. HGB mapping appeared especially well suited to investigate late,  
51 sustained components of the error response, possibly linked to downstream functional  
52 stages such as error-related learning and behavioral adaptation. Our findings establish  
53 the basic spatio-temporal properties of HGB activity as a neural correlate of error  
54 processing, complementing traditional error-related potential studies.

## 55 **Significance Statement**

56 There is great interest to understand how the human brain reacts to errors in goal-  
57 directed behavior. An important index of cortical and subcortical information processing  
58 is fast oscillatory brain activity, particularly in the high-gamma band (above 50 Hz). Here  
59 we show that it is possible to detect signatures of errors in event-related high-gamma  
60 responses with noninvasive techniques, characterize these responses comprehensively,  
61 and validate the EEG procedure for the detection of such signals. In addition, we  
62 demonstrate the added value of intracranial recordings pinpointing the fine-grained  
63 spatio-temporal patterns in error-related brain networks. We anticipate that the optimized  
64 noninvasive EEG techniques as described here will be helpful in many areas of cognitive  
65 neuroscience where fast oscillatory brain activity is of interest.

## 66 **Introduction**

67 Error processing is a fundamental brain function. A breakthrough in research on error  
68 processing in the human brain was the independent discovery of the “error-related  
69 negativity” (ERN) (Gehring et al., 1993), or error negativity (Ne) (Falkenstein et al., 1991)  
70 in noninvasive electroencephalography (EEG). The ERN/Ne is a negative deflection  
71 above the fronto-central midline, peaking shortly after the electromyogram (EMG) onset  
72 of an erroneous response, followed by the error positivity (Pe) (Falkenstein et al., 1991)  
73 with parietal maximum. ERN/Ne and Pe are often assumed to reflect sequential  
74 functional aspects of error processing, including precursors of error detection such as  
75 conflict monitoring and explicit error detection itself. In contrast to the ERN/Ne, the Pe  
76 was linked to conscious error processing (Nieuwenhuis et al., 2001). Moreover, the Pe

77 might reflect evidence strength during error detection and could thus provide input to  
78 further downstream stages, e.g., to the evaluation of the significance of errors and the  
79 implementation of behavioral reactions (Steinhauser and Yeung, 2010).

80 To further dissect error-related processing both in healthy subjects and in patients with a  
81 broad spectrum of brain disorders (Alain et al., 2002; Hajcak et al., 2003; Shiels and  
82 Hawk, 2010), subsequent studies increasingly utilized time-frequency decomposition of  
83 error-related EEG responses. These studies revealed spatial and dynamical behavior of  
84 lower frequency bands like delta, theta, alpha and beta (Table 2) unfolding alongside the  
85 time-domain (ERN/Ne & Pe) evoked electrical field potential changes. There is only  
86 limited data on the role of higher frequencies in error processing, coming from  
87 intracranial recordings in neurological patients (Milekovic et al., 2013; Bastin et al., 2017)  
88 and we are not aware of any other study using noninvasive EEG recorded from the  
89 healthy human brain.

90 However, gamma-band frequencies may be especially important to understand cortical  
91 function in general, including error processing. A large body of empirical evidence  
92 indicates that high-gamma band (HGB, including the 50-150 Hz range) activity is a  
93 spatially and temporally specific index of the underlying, functionally relevant neural  
94 networks (Crone et al., 1998, 2006; Brunel and Wang, 2003). Compared to lower  
95 frequencies, however, detecting HGB power modulations in noninvasive EEG is  
96 challenging for several reasons that are related to the more focal spatial distribution of  
97 cortical high-frequency sources (Crone et al., 2006), their much smaller power,  
98 (Freeman et al., 2000), and their greater susceptibility to artifacts, such as from muscle  
99 activity (Goncharova et al., 2003) or microsaccades. The latter particularly can mimic

100 physiological responses within the HGB range (Yuval-Greenberg et al., 2008).

101 To overcome these problems, we carefully optimized the procedure of EEG acquisition  
102 and analysis for the detection of high-frequency EEG modulations, combining high-  
103 resolution EEG acquisition, optimized electromagnetic shielding, low-noise amplifier  
104 systems, as well as high-precision eye tracking simultaneously acquired to the EEG data  
105 to tightly control for ocular artifacts. Utilizing this optimized setup, we re-examined a  
106 classical paradigm to elicit error responses in a large group (n=35) of healthy subjects.  
107 Furthermore, to validate our noninvasive EEG findings, we also ran the same paradigm  
108 in patients with intracranially implanted electrodes.

109 Our findings clearly demonstrate that error-related HGB brain responses can be  
110 detected in noninvasive EEG recorded from healthy subjects; importantly, we rule out  
111 ocular including micro-saccadic effects as an explanation for the observed HGB  
112 responses, as well as corroborate our noninvasive observations by intracranial EEG  
113 data. For the first time, our findings reveal a clear picture of the global dynamics of the  
114 error-related HGB response of the human brain, starting from an early response  
115 dominated by anterior brain regions, over a shift to medial parietal regions parallel to the  
116 Pe, and finally to a subsequent phase characterized by sustained parietal HGB activity.  
117 This phase lasts for more than 1 s after the onset of the error event and constitutes a  
118 novel candidate signal of the downstream processes following the classical Pe.  
119 Combined investigation of both the classical error-related potentials and of HGB  
120 modulations thus promises to shed new light on error processing in the human brain.

## 121 **Materials & Methods**

### 122 **Subjects**

123 In the noninvasive EEG study, 35 healthy subjects participated; thereof, 4 subjects had  
124 to be excluded because of extensive muscular or ocular artifacts. Thus, data of 31  
125 subjects (mean age 24.6 years, standard deviation (SD) = 3.1 years, 15 females) were  
126 further analyzed. Handedness was assessed according to a modified Edinburgh  
127 handedness questionnaire (Oldfield, 1971); 28 subjects were right-handed, 3 were left-  
128 handed. All stated not to have neurological or psychiatric diseases and not to be under  
129 the influence of medication affecting the central nervous system.

130 In the intracranial EEG study, 9 right-handed patients (mean age 27.0 years, SD = 7.7  
131 years, 4 females) with pharmaco-resistant epilepsy were recruited. They were implanted  
132 with intracranial electrodes in Freiburg, Germany, or in Prague, Czech Republic.

133 All subjects and patients gave their written informed consent before participating in the  
134 study. The study was approved by the local ethics committees.

### 135 **Experimental design**

136 To probe error-related processing, we used the Eriksen flanker task (Eriksen and  
137 Eriksen, 1979) (Fig. 1) as employed in a pioneering study in this field of research  
138 (Gehring et al., 1993) as well as in many follow-up publications (Kopp et al., 1996;  
139 Botvinick et al., 1999; Gehring and Knight, 2000; Nieuwenhuis et al., 2002; Ridderinkhof  
140 et al., 2002; Herrmann et al., 2004b; Albrecht et al., 2009; Maier et al., 2012; Zavala et  
141 al., 2013). At the beginning of each trial, a cue in the form of an asterisk was shown to  
142 the subjects in the center of a 19-inch monitor (4:3-screen ratio, 60-Hz frame rate) for

143 1 s. After that, one of four stimuli was shown for 100 ms, each with a probability of 0.25.  
144 Two of the stimuli were *congruent stimuli* (LLLLL & RRRRR) and the other two  
145 *incongruent stimuli* (RRLRR & LLRLL). To respond, subjects used their left or right  
146 index finger to press the left or right analog shoulder button on a wireless gamepad  
147 (Logitech F710, Apples, Switzerland) if the central letter of the stimulus was an "L" or  
148 "R", respectively. The deflection threshold of the analog joystick button was set to 10%  
149 of its maximal deflection.

150 As proposed by (Herrmann et al., 2004b), we set an individual reaction time limit for  
151 each subject. This response time limit was determined as the mean response time in a  
152 32-trial training session. Subjects were instructed to respond as fast and as accurately  
153 as possible. The subjects were also introduced to a scoring point system, and instructed  
154 to get as many points as possible. For each correct response, subjects gained 5 points,  
155 and lost 5 points in the event of an erroneous response. By missing the individual  
156 reaction time limit, subjects lost 10 points; this stronger penalty was introduced to keep  
157 the subject under time pressure, hence inducing errors. In each break after a recording  
158 run, the score and performance of the respective run was shown to the subjects along  
159 with a comparison to their total performance up to this run.

160 Two seconds after their response, the subjects received an audiovisual feedback  
161 according to their performance. If the response was fast enough and correct, the  
162 feedback consisted of a smiling face icon and a 1-kHz sine tone, the feedback for an  
163 erroneous but fast enough response consisted of a sad face and a 500-Hz sine tone.  
164 For responses slower than the individual reaction time limit, a cartoon of a snail was  
165 displayed accompanied by a 5-kHz sine tone. The two-second delay was introduced to

166 avoid an influence of the feedback on error-related brain responses. We did not verify  
167 the error awareness prior to the feedback directly; however, all subjects reported that  
168 they were aware of most errors directly after the motor response.

169 Before the start of each trial, only the fixation dot was shown for 3 s. In the case of  
170 healthy subjects, one session consisted of 100 trials, after which the subjects had the  
171 possibility to have a break. Each experiment included 10 sessions, so that altogether  
172 1000 trials were collected for each subject; on average, the error rate was  $22.23 \pm 0.11$   
173 (mean  $\pm$  SD) %. Recording sessions with epilepsy patients were shorter and included  
174 overall fewer trials depending on the condition of the respective patient. On average,  
175 patients completed  $369 \pm 111$  trials, thereof  $218 \pm 74$  correct trials and  $57 \pm 32$  error  
176 trials, with a total error rate of  $20.95 \pm 0.11$  %.

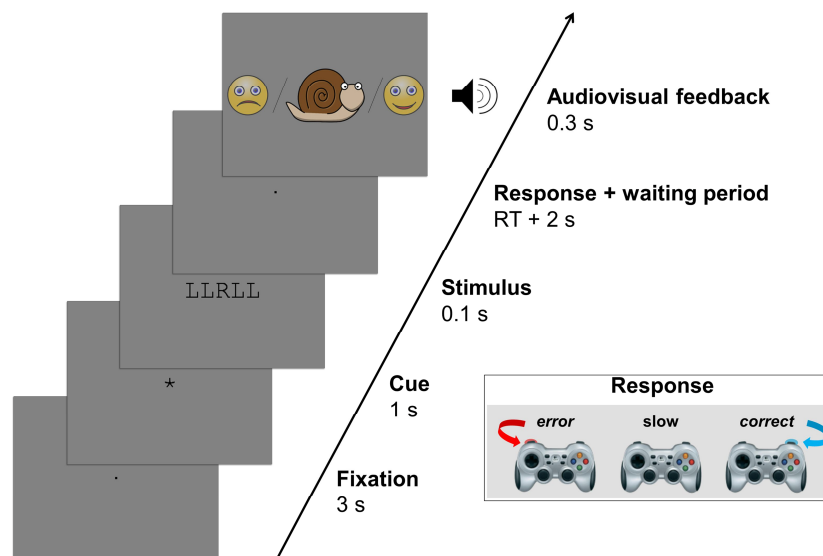

177  
178 **Figure 1: Flowchart of the Eriksen flanker task paradigm used to elicit errors.**  
179 After a fixation period (3 s), and a cue period (1 s), the stimulus appeared for a short period of time  
180 (100 ms). Subjects had only a limited amount of time, individually set to their reaction time (RT) in a  
181 familiarization phase of the experiment, to press a gamepad button with their left index finger if the central  
182 letter of the stimulus was an “L” or with their right index finger if the central letter was an “R” (see example



183 with 'R' target letter in inset). 2 s after the button press, one of the three types of audiovisual feedback  
184 indicated to the subjects whether their response was correct, incorrect, or too slow.

## 185 **Recording and preprocessing of noninvasive EEG**

186 The noninvasive EEG setup was optimized for the measurement of high-frequency  
187 responses. We used NeurOne amplifiers (Mega Electronics Ltd., Kuopio, Finland) with a  
188 24-bit resolution and low input noise (root mean square < 0.6  $\mu$ V between 0.16-200 Hz).  
189 We recorded 128 EEG channels with the waveguard EEG cap (ANT Neuro, Enschede,  
190 Netherlands) at a sampling rate of 5 kHz (AC, 1250-Hz anti-aliasing low-pass filter). The  
191 cap held sintered Ag/AgCl electrode elements and was available in three different sizes  
192 to be suitable for variable head sizes. Electrode position Cz was used as recording  
193 reference; the ground was located between AFz and Fz. Whenever possible,  
194 impedances were kept below 5 k $\Omega$ . Additional measurements included  
195 electrooculography (EOG) with 4 electrodes around the eyes, 2-channel  
196 electrocardiography (ECG) and bipolar electromyography (EMG) above the forearm  
197 flexor muscles of both arms and above the gastrocnemius muscle of both legs; EMG,  
198 EOG and ECG were recorded with self-adhesive electrodes.

199 The EEG recordings took place in an electromagnetically shielded cabin ("mrShield" -  
200 CFW Trading Ltd, Heiden, Switzerland) to reduce electromagnetic artifact  
201 contamination. All exchange of information between inside and outside of the cabin was  
202 done with fiber optic cables to sustain the shielding. Also, electrical devices inside the  
203 cabin, such as EEG amplifier, eye tracker and loudspeakers, were powered by DC  
204 batteries to prevent 50-Hz power line artifacts from interfering with the EEG signal. The  
205 cabin furthermore dampens sounds and vibrations to protect the subject from external

206 noise.

207 Both control of the experiment as well as data analysis was carried out using Matlab  
208 R2014a (The MathWorks Inc., Natick, USA, RRID:SCR\_001622). Implementation of the  
209 paradigm was done within the Psychophysics Toolbox (Brainard, 1997,  
210 RRID:SCR\_002881). Synchronization of the EEG data and the experimental paradigm  
211 was achieved by using a parallel port to send different trigger pulses for each event from  
212 Matlab to the EEG amplifiers.

213 To control the signal quality, a visual inspection of the EEG data was done both  
214 continuously during the measurement as well as after the experiment in Brainstorm  
215 (Tadel et al., 2011). We searched for EMG artifacts by examining time course and  
216 topography of single-trial data. Channels with strong contamination with EMG artifacts  
217 were excluded from further analysis in single subjects; on average, we rejected  $1.03 \pm$   
218  $1.75$  (mean  $\pm$  SD) channels.

219 During signal processing, the EEG data and markers were down-sampled from 5 kHz to  
220 1 kHz (time-frequency analysis) or 500 Hz (voltage plots). Channels were re-referenced  
221 to their common average. The signal was filtered with a Butterworth high-pass filter of  
222 fourth order with a cut-off frequency of 0.5 Hz.

223 The indices of the correct and false responses were extracted and aligned on the  
224 response EMG. The time point of the EMG onset was found by applying a threshold  
225 based retrospective search on the arm EMG channels.

## 226 **Intracranial EEG recording, localization and preprocessing**

227 Recording of intracranial EEG signal was done either with Compumedics amplifiers

228 (Singen, Germany) at the epilepsy center in Freiburg, Germany (2 kHz sampling rate), or  
229 with Schwarzer Epas amplifiers (Munich, Germany) and Nicolet EEG C-series amplifiers  
230 (Pleasanton, USA) at the epilepsy center of the Motol University Hospital in Prague,  
231 Czech Republic (512 Hz sampling rate). The depth electrodes used for recording had  
232 platinum-iridium contacts (DIXI Medical, Lyon, France & AD-TECH, Racine, WI, USA).

233 The preprocessing was done as for the noninvasive data, with the difference that the  
234 channels were re-referenced bipolarly between the respective neighbors.

235 The stereotactic depth electrodes were localized with the help of their post-implantation  
236 MRI or CT artifacts in a normalized and co-registered MRI of each patient as described  
237 in Pistohl et al. (2012). After transformation to the MNI coordinate system,  
238 cytoarchitectonic probabilistic maps were calculated with the SPM anatomy toolbox  
239 (Eickhoff et al., 2005, 2006, 2007) to assign the electrodes to specific brain regions. This  
240 method accounts for inter-subject differences in brain anatomy and allows the  
241 comparison on a group level with high precision (Amunts et al., 2007).

242 Electrodes positioned inside a seizure onset zone or showing frequent interictal activity,  
243 as identified by experienced epileptologists, were excluded from further analysis. Of 885  
244 bipolar referenced channels from 9 patients, we removed 76 channels because they  
245 could not be assigned to a specific brain region, 53 channels which were positioned  
246 inside a seizure onset zone, 59 channels because of frequent interictal activity, and 7  
247 channels due to technical problems or position outside the brain. Approximately 20 % of  
248 the remaining electrodes were identified as lying within white matter. As a control, we  
249 also did the analyses of the intracranial data after splitting white and gray matter  
250 electrodes; however, as we found that white matter electrodes, especially those near

251 boundary areas, were able to sample a number of significant effects, and further did not  
252 change any findings, we did not exclude these channels from further analysis.

253 Thus, 690 sites were available for further analysis.

254 The visualization of intracranial and scalp EEG electrodes in relation to the cortex  
255 surface was done with Brainstorm (Tadel et al., 2011). The intracranial electrodes were  
256 visualized on an ICBM152 brain template (Mazziotta et al., 2001; Fonov et al., 2009).

### 257 **Time-frequency analysis**

258 Time-resolved spectral power was computed with a multitaper method (Thomson, 1982)  
259 with a window length of 500 ms, a step size of 50 ms and two Slepian taper functions.  
260 Trial averages were computed with a median function, which proved to be a robust  
261 method in past EEG studies (Ball et al., 2008). To visualize error-related power  
262 modulations we baselined all time-frequency bins in each error trial by the corresponding  
263 bin of the median correct response trial (i.e., by dividing the error responses by median  
264 of the correct responses). Thus, the motor-related activity common to both response  
265 types canceled out. For calculation of error-related activity or power, this method of  
266 baselining was applied.

### 267 **Exclusion and statistical matching of ocular artifacts**

268 Ocular movements were recorded with the EyeLink 1000 plus (SR Research Ltd.,  
269 Ottawa, Canada, RRID:SCR\_009602), enabling binocular eye movement recordings  
270 with a high-speed infrared illuminator and camera; the sampling rate for binocular  
271 recording was 500 Hz.

272 For the extraction of microsaccades, an algorithm as described by Engbert and Kliegl

273 (2003) was used with the default minimal microsaccade duration threshold of 12 ms.  
274 Time points of blinks and saccades were identified with the algorithms provided by the  
275 EyeLink recording software.

276 All trials in which a blink occurred within the time window of 0.5 s prior and 2 s after the  
277 response were excluded from further analysis to ensure that the EEG signal in the  
278 analyzed time frame was not contaminated with blink artifacts. On average,  $112 \pm 164$   
279 (mean  $\pm$  SD) trials were rejected across subjects.

280 To exclude possible influences of saccades and microsaccades on high-frequency EEG  
281 correlates, we matched each time bin of the correct and error trials after the time  
282 frequency decomposition. This was done by incrementally removing time bins from the  
283 correct condition, which always had more trials. At each iteration step, the time bin which  
284 contributed the most to the residual difference, as calculated by a sum of squares of  
285 saccade and microsaccade counts, was removed. This process was repeated until the  
286 p-value calculated with a sign test comparing error and correct condition was greater  
287 than 0.3.

## 288 **Statistical analysis**

289 For visualization of median voltage, the standard error of the median was calculated per  
290 condition using bootstrap sampling (Moore and McCabe, 1989) with 1000 re-samples,  
291 using the 2.5<sup>th</sup> and 97.5<sup>th</sup> percentile of the population as standard error. Median time or  
292 frequency bins which had a significant difference between the correct and erroneous  
293 condition were identified with the Wilcoxon rank sum test (Mann and Whitney, 1947) in  
294 single subjects or with a two-sided sign test (Dixon and Mood, 1946) across subjects.  
295 Significance of median power changes within individual conditions was computed with a

296 two-sided sign test. Whenever multiple comparisons were done, we estimated the  
297 positive false discovery rate (pFDR) for each p-value (Benjamini and Hochberg, 1995;  
298 Storey, 2002, 2003).

## 299 **Results**

300 Here we show for the first-time error-related high-gamma responses in a noninvasive  
301 EEG study (with 31 healthy subjects) and additionally compare and corroborate them  
302 with intracranial EEG measurements (in 9 patients with pharmaco-resistant epilepsy).

### 303 **Error-related voltage and spectral power modulations in noninvasive EEG**

304 In the following, we show an overview of the dynamics and topography of voltage and  
305 spectral power modulations, as averaged over the 31 healthy subjects included in this  
306 study, in correct responses (Fig. 2), erroneous responses (Fig. 3) as well as the  
307 difference between the two conditions, i.e., error-related activity (Fig. 4). The spectral  
308 power responses are shown up to 300 Hz in the time interval from 0.7 s before until 1.5  
309 s after the response. For these and all comparable topographical results, the positive  
310 false discovery rate was calculated across 128 channels, 24 frequency bands, and 61  
311 time points (1 s before response onset until 2 s after response onset in steps of 50 ms).  
312 Error-related HGB activity had its maximum approximately between 60 and 90 Hz (Fig.  
313 2-4, yellow background), or more narrowly located between 70 and 80 Hz (Fig. 2-4, blue  
314 background). Based on these observations, we decided to use these frequency ranges  
315 for a closer inspection of HGB responses in the following analyses

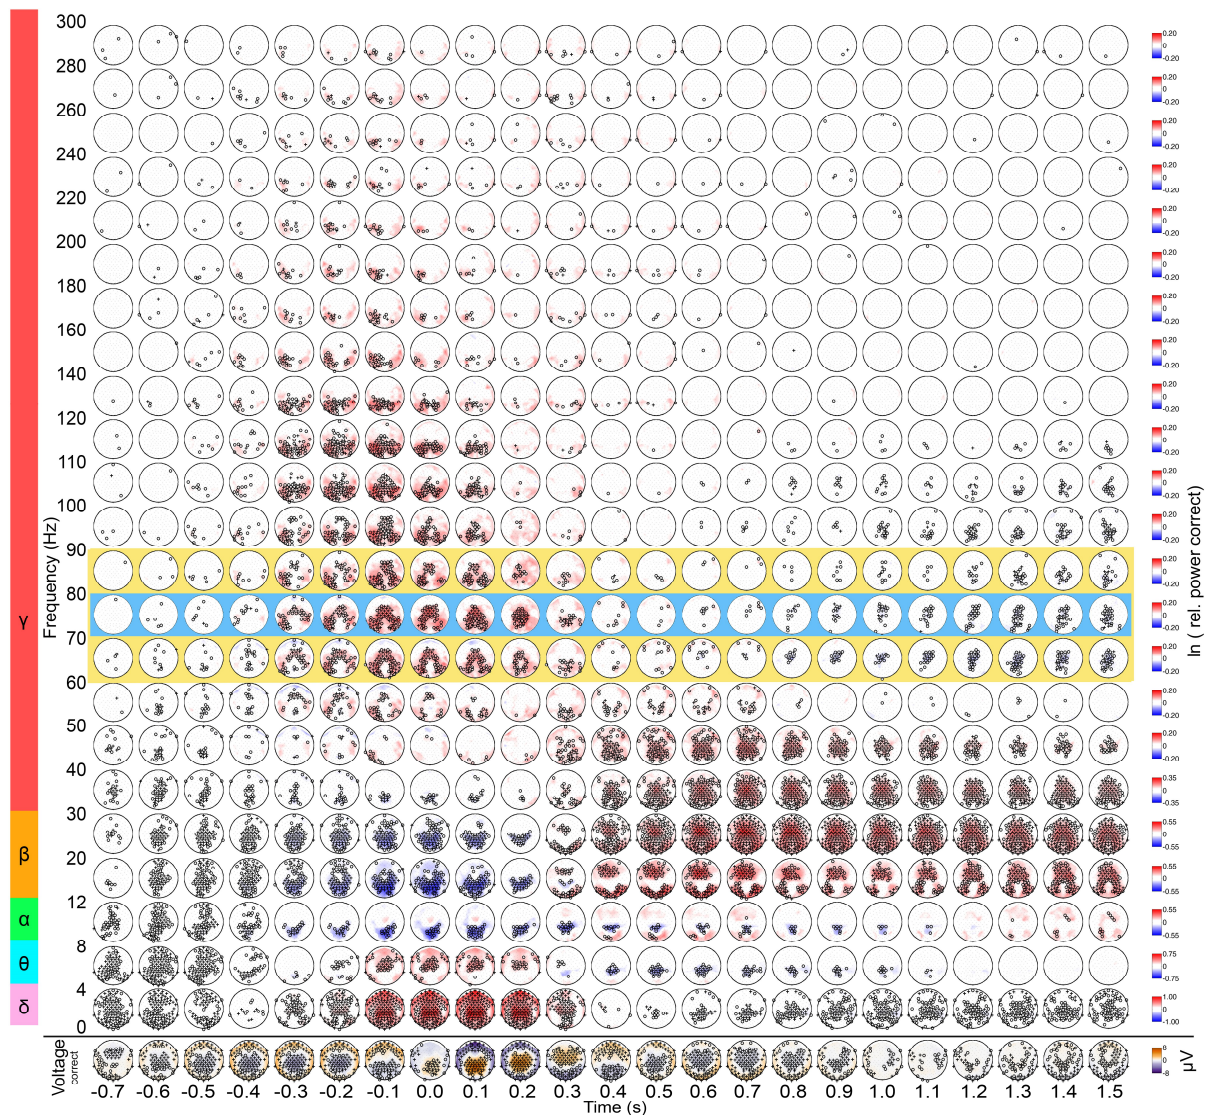

316

317 **Figure 2: Topography of voltage and spectral power modulations in a correct response.**

318 The circular plots represent a top view of the head with the nose pointing up. At the bottom, the average  
319 response is plotted (median of 31 subjects). Above, the median spectral power modulations relative to the  
320 time from -1 s to -0.5 s prior to the response, are depicted for 23 frequency bands from 0 to 300 Hz. Red  
321 color indicates higher power than in the baseline, blue color indicates lower power than in the baseline  
322 period. Electrodes with significant power modulations are marked with “o” or “+” (sign test, pFDR<0.05 or  
323 pFDR<0.01, respectively). The data is aligned to response onset.

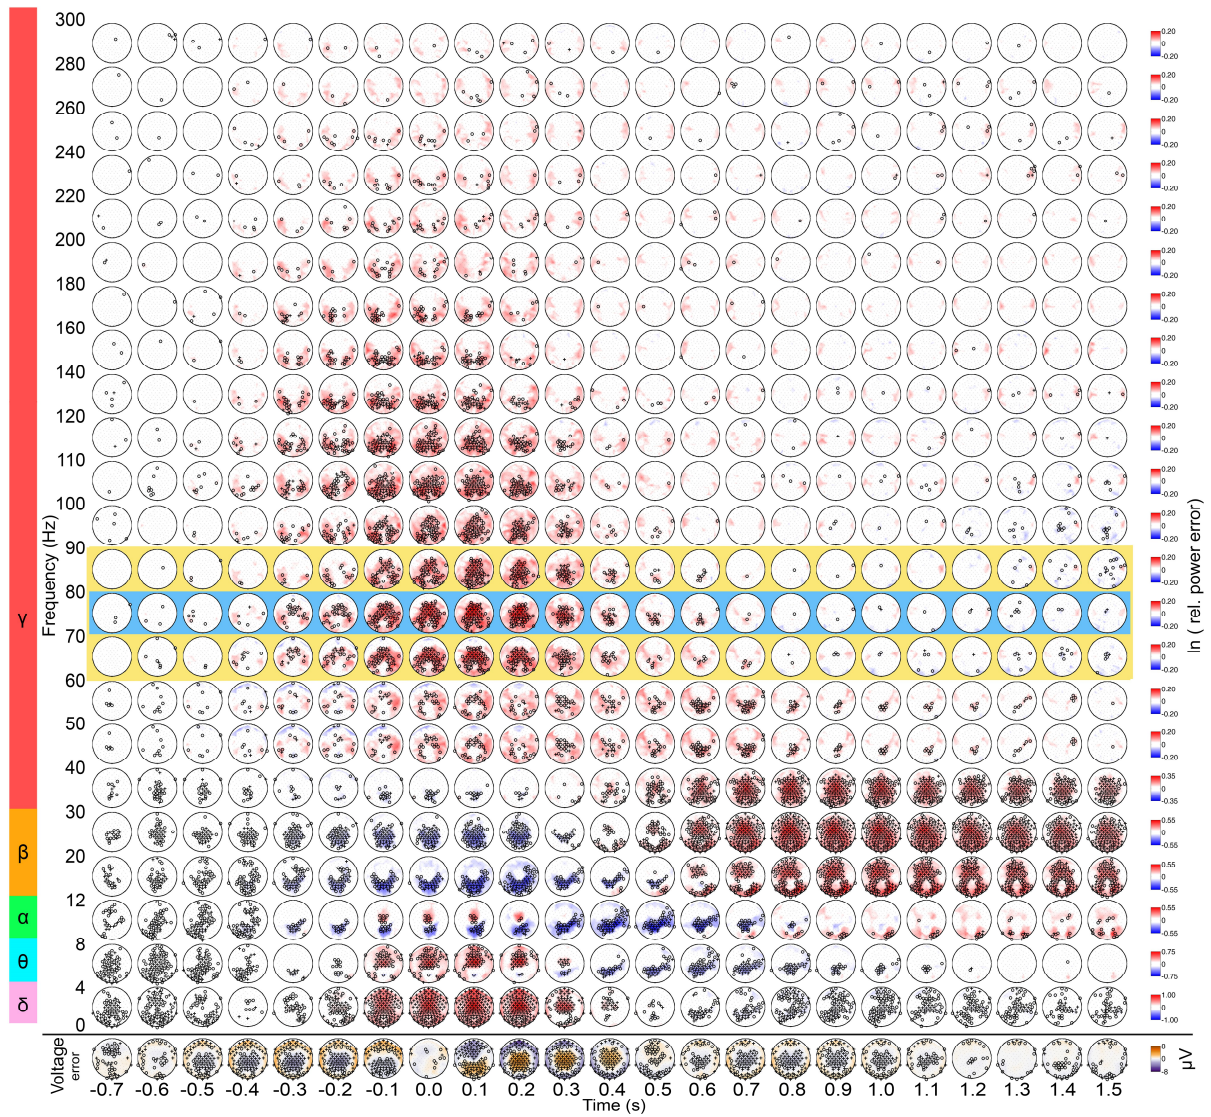



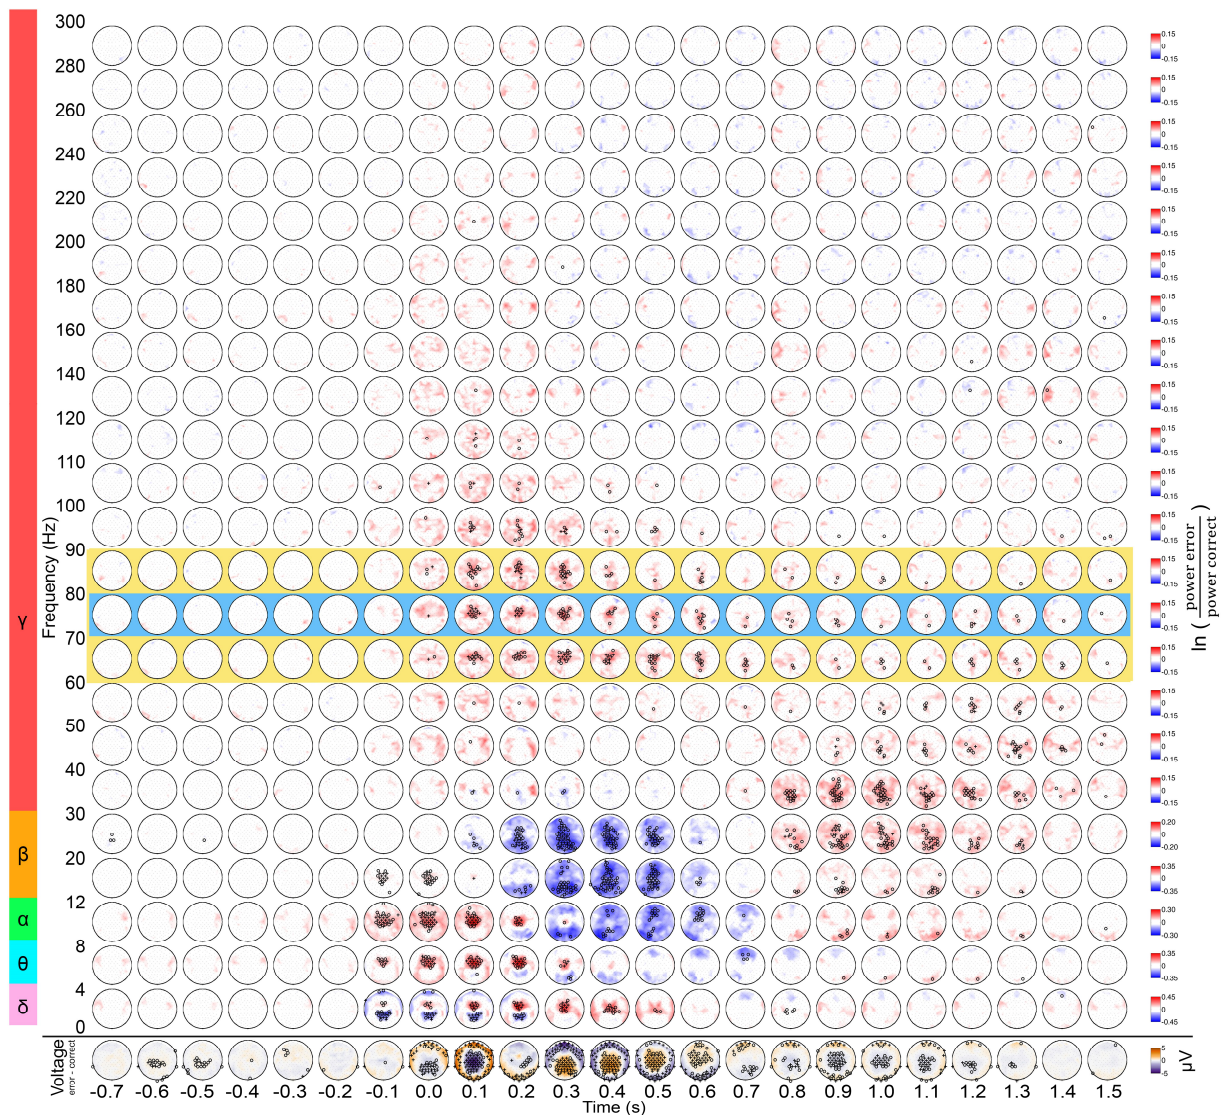

327  
328 **Figure 4: Topography of error-related voltage and spectral power modulations.**  
329 Conventions as in Figure 2. At the bottom, voltage differences between error and correct response are  
330 shown topographically (median of 31 subjects). Above, median error-related spectral power modulations  
331 are shown, i.e., each time-frequency point of the error response was baselined with the same point of the  
332 median correct response. Red color indicates higher power in error responses, while blue color indicates  
333 higher power in correct responses. Electrodes with significant differences between error and correct  
334 condition are marked with "o" or "+" (sign test, pFDR<0.05 or pFDR<0.01, respectively). The data is  
335 aligned to response onset.

336 Comparing error and correct conditions, significant differences became evident. While  
337 there was lower power at parietal channels in the delta band ( $< 4$  Hz) during and after  
338 errors, fronto-central channels exhibited an error-related power increase in the delta and  
339 the theta band (4-8 Hz). In the alpha band (8-12 Hz), a spatially more widespread power  
340 increase during and shortly after the erroneous response occurred, followed by an  
341 attenuation with lower power compared to correct responses. Within the beta band (12-  
342 30 Hz), a widespread power decrease concurred with the Pe. In the low-gamma band  
343 (LGB, 30-50 Hz), differences were mostly apparent at a later time, starting 800 ms post-  
344 response in the form of a power increase in the 30-40 Hz frequency range.  
345 Simultaneously with the late LGB increase, a second (with the ERN/Ne being the first)  
346 significant negative voltage deflection was seen at central channels.

347 Crucial to the present study, in the high-gamma band (HGB,  $> 50$  Hz), a significant  
348 error-related power increase occurred at fronto-central channels shortly after the  
349 response onset, and shifted to more central and parietal areas over the course of a few  
350 hundred milliseconds, where the error-vs-correct relative HGB power stayed significantly  
351 increased until up to 1.5 s after the response. Similar high-gamma increases were  
352 observed in errors both after incongruent and congruent stimuli classes (data not  
353 shown). After an initial HGB power increase, there was a significant midline power  
354 decrease in correct responses after 800 ms until at least 1.5 s (Fig. 2). This power  
355 decrease was not observed after erroneous response (Fig. 3)

356 Fig. 5 depicts the median frequency profile of the correct, error and error/correct  
357 conditions for a central region of interest (ROI).

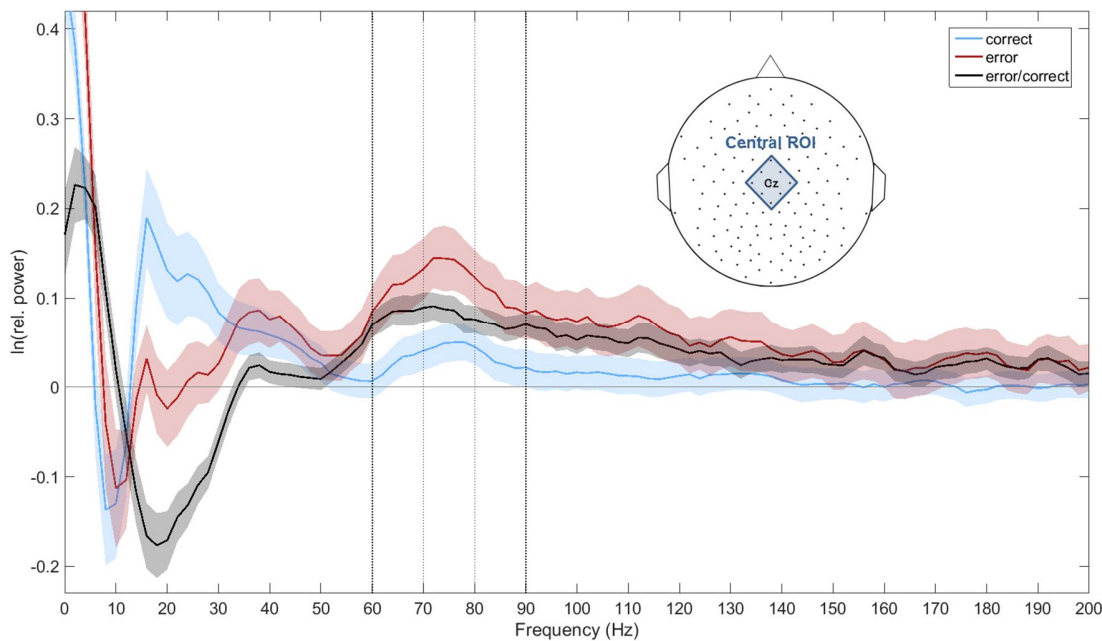

358

359 **Figure 5: Frequency profile of spectral power modulations in an Eriksen flanker task.**

360 The average frequency profile for the correct (blue), error (red) and error/correct condition (black) is shown  
361 averaged over a central ROI (FCz, FCC1h, FCC2h, C1, Cz, C2, CCP1h, CCP2h, CPz) during a time of  
362 interest between 0 s and 0.6 s relative to response onset. The SEM is plotted semitransparent. While  
363 relative power changes were highest in the delta (0-4 Hz) and theta (4-8 Hz) range, strong modulations  
364 were also observed in the alpha (8-12 Hz), beta (12-30 Hz) and high-gamma (> 50 Hz) range. The two  
365 frequency ranges of interest in the high-gamma range are marked with bold (60 to 90 Hz) and thin (70 to  
366 80 Hz) dashed lines, respectively.

367 Error-related voltage and spectral power modulations of selected frequency bands in  
368 surface EEG are shown in Fig. 6. Topography and time course of the classical ERN/Ne  
369 and Pe components can be seen in the upper part. In the lower part of the figure, the  
370 relative power differences between error and correct condition are plotted in five  
371 frequency ranges of interest at the time point of the ERN/Ne and Pe components.

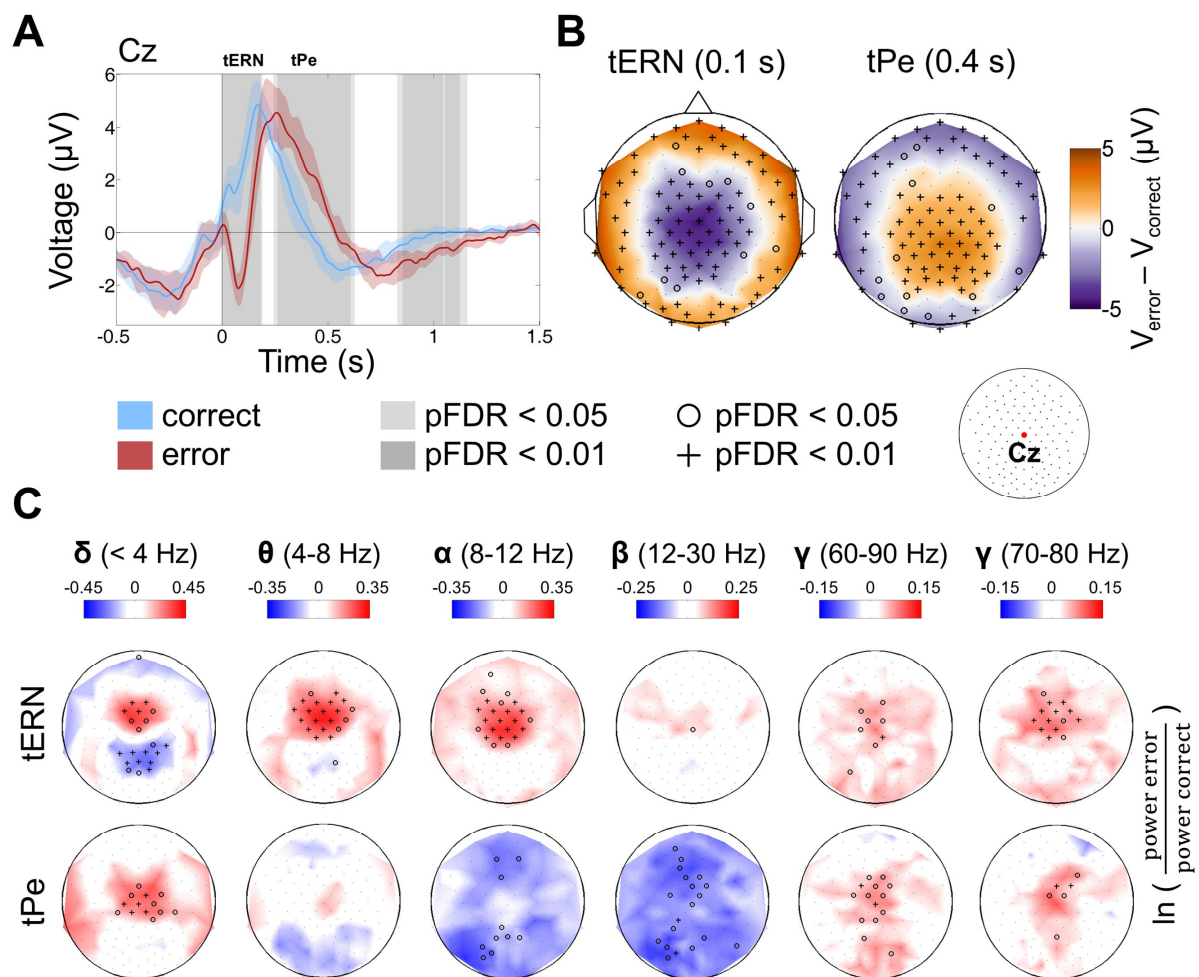

372

373 **Figure 6: Error-related voltage and spectral power modulations in high-density EEG.**

374 **A)** Single channel plot (electrode position Cz) locked to response EMG onset. The median correct  
 375 response is shown in blue, the median erroneous response in red. The standard error of the median is  
 376 plotted semitransparent. The vertical dotted line marks the EMG onset. Times with significant differences  
 377 between the error and correct condition are shown with a gray background; pFDR values were calculated  
 378 across 1501 time points (-1 s to 2 s, 500 Hz). **B)** Topographical map of the event-related potentials at the  
 379 time of the ERN/Ne ( $t_{\text{ERN}}$ ) and the Pe ( $t_{\text{Pe}}$ ) components. Median voltage difference between error and  
 380 correct trials is shown color coded. Electrodes with significant differences are marked with "o" or "+" (sign  
 381 test, pFDR<0.05 or pFDR<0.01, respectively); pFDR values were calculated across 31 time points (-1 s to  
 382 2 s in steps of 100 ms) and 128 channels. **C)** Error-related spectral power modulations in the theta, alpha,  
 383 beta, and high-gamma range. Logarithmic relative power of the median erroneous response baselined

384 with median correct response is shown color coded. Significant sites as determined (sign test) are marked  
385 as in (B); pFDR values were calculated as in Fig. 3. Error-related effects in the high-gamma range had a  
386 maximum at fronto-central sites at the time of the ERN/Ne peak; at the time of the Pe maximum, the HGB  
387 increase was shifted to midline electrodes in a parietal direction.

388 The high-gamma band response, shown here for the time window between 70 and 80  
389 Hz, exhibited significantly higher power in error than correct responses. In the time  
390 window of the ERN/Ne maximum, the error-related HGB power was centered at fronto-  
391 central channels, while it started to shift to more posterior areas around the maximum of  
392 the Pe.

393 We calculated Spearman's rank correlation level between the ERN/Ne and Pe amplitude  
394 and the error-related spectral modulations in the 70-80 Hz band across subjects. The  
395 calculation was done on the signals of the channels with the maximal amplitudes of the  
396 components of interest, which was FCz for the ERN/Ne and CPz for the Pe component.  
397 There was no significant correlation found. Spearman's rho for the ERN/Ne with error-  
398 related HGB components was  $r_s = -0.05$  and  $p = 0.78$ , and for Pe  $r_s = 0.10$  and  $p = 0.58$ .

### 399 **Effects of eye movements on high-gamma signals**

400 During the experiments, a great number of miniature eye movements were recorded for  
401 each subject. After discarding those events near blinks, on average  $6300 \pm 2500$  (mean  
402  $\pm$  SD) microsaccades were recorded per subject. To examine the spectral power  
403 modulations related to this class of eye movements more closely, we also examined  
404 EEG data aligned to the onset of the microsaccades. Fig. 7 shows the group median of  
405 those trials. Both at fronto-polar and parieto-central EEG channels, there was a broad-  
406 band gamma increase during microsaccade (and saccade, data not shown) onset. This

407 increase was prominent from 25 to 120 Hz. In lower frequency bands, e.g., in the delta  
408 band, we observed a power decrease, which continued until 500 to 600 ms after the  
409 microsaccade onset.

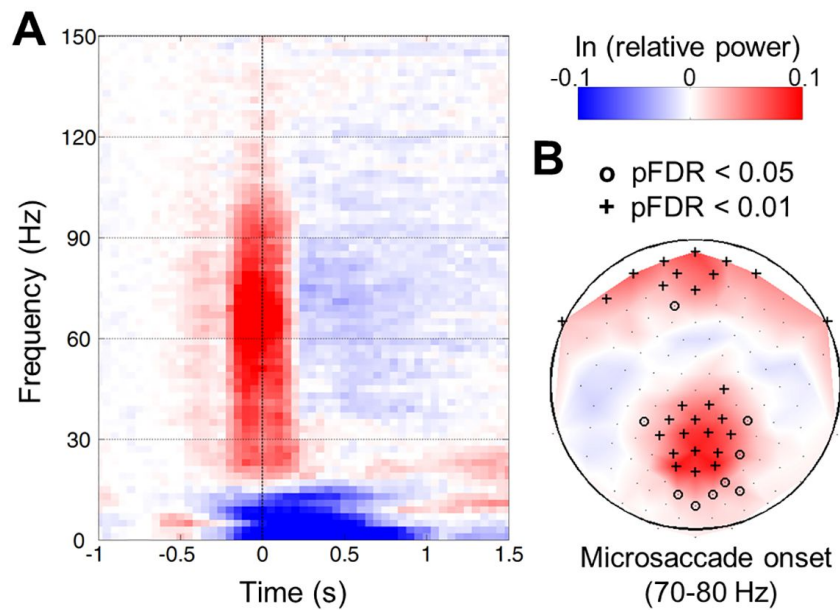

410  
411 **Figure 7: Microsaccade-related time-frequency spectrum in scalp EEG.**  
412 The plots show a group median of the 31 subjects; the data is aligned to microsaccade onset. **A)** Time-  
413 frequency plot of a parieto-central channel (Pz). The log-power (color-coded) was taken relative to a  
414 baseline from -1 s to -0.5 s. **B)** Topography of 70-80 Hz high-gamma relative power at the time of  
415 microsaccade onset. Electrodes with significant differences are marked with “o” or “+” (sign test,  
416 pFDR<0.05 and pFDR<0.01, respectively); pFDR values were calculated as in Fig. 3.

417 Next, in each subject we matched the correct and error condition to have the same  
418 amount of microsaccades and saccades within each time-frequency bin of the EEG data  
419 after the multitaper analysis. To examine the effect of this measure on the results, we  
420 compared the error-related high-gamma activity in matched and unmatched data  
421 (Fig. 8).

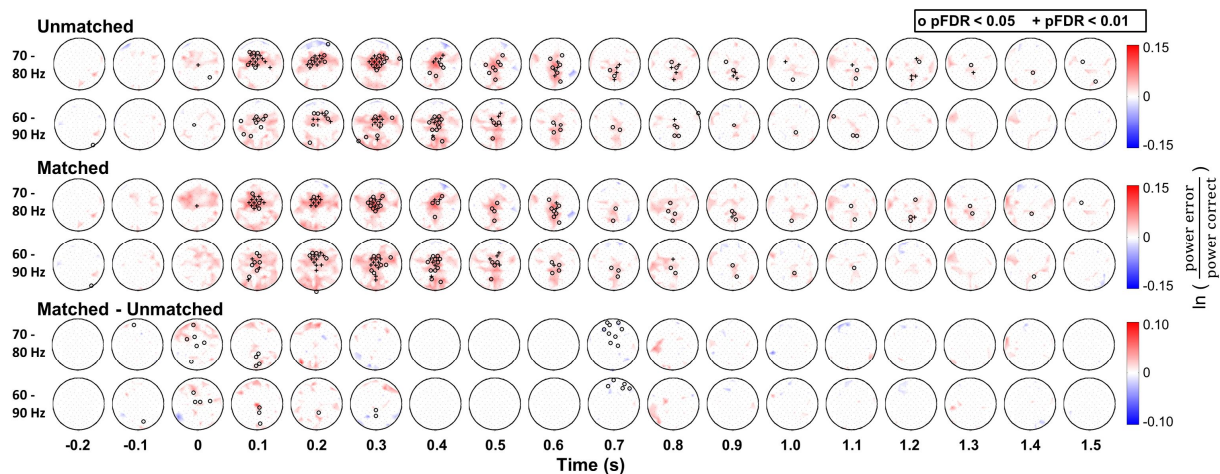

422

423 **Figure 8: Influence of saccade and microsaccade matching on error-related high-gamma in**  
424 **noninvasive EEG.** All plots show group results of the 31 subjects, aligned to EMG response onset. In the  
425 top row, error-related high-gamma activity in the 70-80 Hz and 60-90 Hz range is plotted for the data  
426 before matching. The middle row depicts the same results after matching each time bin for microsaccade  
427 and saccade frequency. In the bottom row, the differences between unmatched and matched data are  
428 shown. Significant sites are marked as in Fig. 4.

429 After the matching, the distribution of electrodes with significant changes in the high-  
430 gamma band was only minimally altered, and the overall pattern remained the same.  
431 There were only very few significant differences between the original and the matched  
432 data. We conclude the error-related effects cannot be attributed to the occurrence of  
433 saccades and microsaccades.

#### 434 **Error-related high-gamma activity: frontal vs. parietal regions**

435 We further wished to compare error-related high-gamma activity at frontal and parietal  
436 regions as the two major foci of the HGB response. To this aim, we averaged HGB  
437 activity in a frontal and a parietal region of interest (ROI).

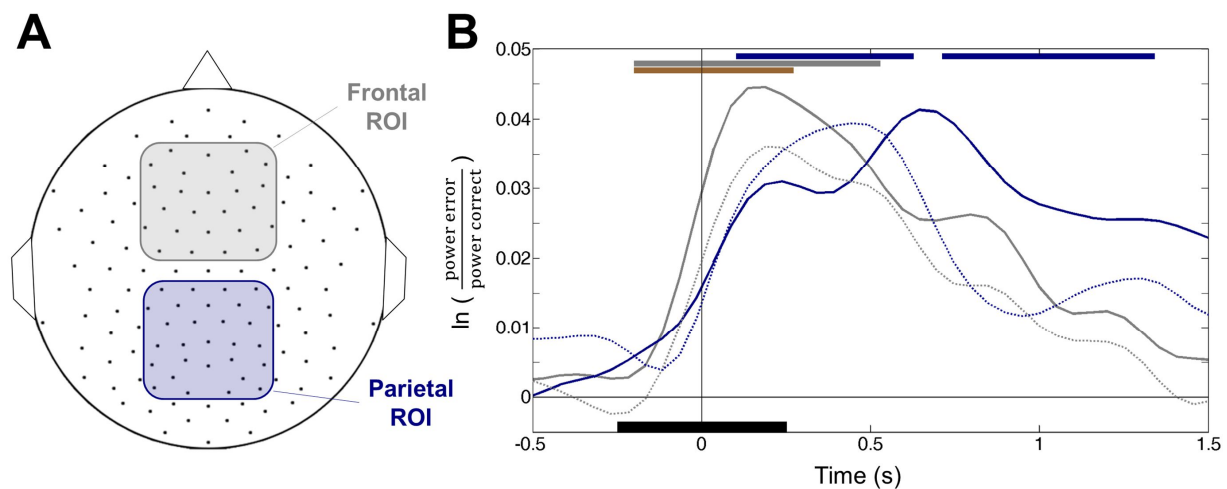

438

439 **Figure 9: Time course of error-related 70-80 Hz HGB activity in frontal and parietal regions.**

440 **A)** Illustration of the frontal region of interest (ROI) including 25 electrodes (gray) and a parietal ROI with  
441 27 electrodes (blue). **B)** The median error-related 70-80 Hz high-gamma power is plotted for both ROIs in  
442 the respective colors; error-related 60-90 Hz power is plotted with dashed lines in the same colors. The  
443 bars above indicate times when the 70-80 Hz HGB activity in the frontal (gray), parietal (blue) or difference  
444 of both ROIs (brown) was significant (sign test,  $pFDR < 0.01$ , calculated as in Fig. 6 A). Time point zero  
445 represents the response EMG onset. The black bar around 0 s at the bottom of the plot indicates the  
446 temporal width of the Gaussian window function (0.5 s) used for the time-resolved spectral density  
447 estimation during moving average-calculation, explaining the smoothness of the curves above.

448 Error-related HGB power in the frontal ROI reached its maximum around 150 to 200 ms  
449 after response EMG response onset. The same frequency band in the parietal ROI  
450 showed a later peak at 600 to 700 ms. The HGB power in the parietal ROI was  
451 significantly increased until up to 1.3 s after the EMG response onset. In the time around  
452 the EMG onset, error-related HGB activity in the frontal ROI was significantly (sign test,  
453  $p < 0.01$ ) stronger than in parietal regions.

#### 454 **Confirmation in Intracranial EEG Measurements**

455 Intracranial EEG measurements in 9 patients yielded a multitude of error-related



456 changes. For comparability, we concentrated the analysis of error-related high-gamma  
457 activity in intracranial EEG to the 60-90 Hz band, as the frequency of interest in  
458 noninvasive EEG. An overview of the electrode locations of all 9 patients and sites with  
459 significant changes in this range is shown in Fig. 10 together with examples of single-  
460 channel time-frequency responses.

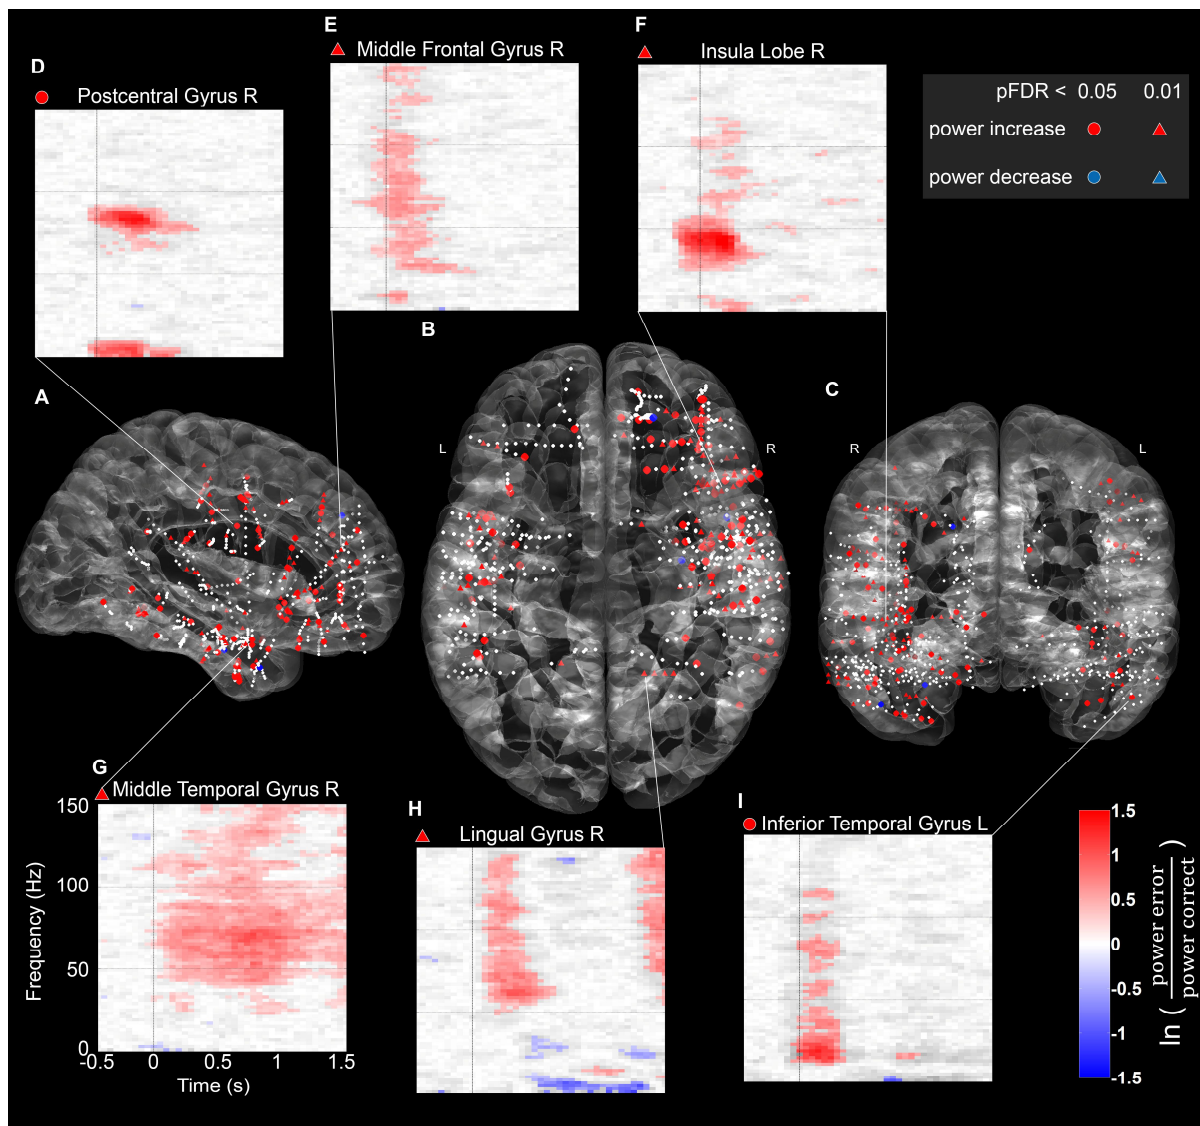

461  
462 **Figure 10: Distribution of error-related high-gamma (60-90 Hz) responses in intracranial EEG.**  
463 Depth electrodes of 9 epilepsy patients are plotted in white on the semi-transparent ICBM152 brain  
464 template from sagittal (A), axial (B), and coronal (C) views. Sites with significant activations in the 60-90  
465 Hz range in the time of interest between 0 s and 0.6 s after an error, as identified in noninvasive EEG,

466 were marked with colored circles or triangles (sign test,  $pFDR < 0.05$  or  $pFDR < 0.01$ , calculation of  $pFDR$   
467 values across all channels). The marker color indicates whether there was a relative power increase (red)  
468 or decrease (blue) compared to correct responses. Exemplary single-channel time-frequency plots are  
469 shown above and below together with their assignment to anatomical areas; time-frequency bins with  
470  $pFDR > 0.05$  are shown grayed out (calculation of  $pFDR$  across 51 times (-0.75 s to 1.75 s, 50 ms steps)  
471 and 126 frequencies (0-250 Hz, 2 Hz steps). Color scale as in Fig. 6 C.

472 Error-related high-gamma modulations were found in multiple areas across the cortex,  
473 mostly manifesting as power increases relative to correct responses. As is noticeable in  
474 the exemplary time-frequency plots, we observed different types of error-related HGB  
475 modulations in intracranial EEG. Firstly, responses with a clear maximum which was  
476 restricted to a small area in time and frequency, as the examples from the postcentral  
477 gyrus and the insula (Fig. 10 D,F). Secondly, responses with a transient, broadband  
478 gamma increase, e.g., in the middle frontal gyrus, the lingual gyrus or the inferior  
479 temporal gyrus (Fig. 10 E,H,I). Thirdly, responses with a broad-band gamma increase  
480 and with a long duration of around 2 s, e.g., in the middle temporal gyrus (Fig. 10 G).

481 More significant HGB modulations were located in the right hemisphere; however, it is to  
482 note that our sample consisted of more electrodes in the right hemisphere (443 sites  
483 after bipolar re-referencing & channel rejection) compared to the left hemisphere (247  
484 sites). Across the 9 patients, we observed an average error rate of  $21.09 \pm 0.11$  (mean  $\pm$   
485 SD) % with the left hand, and  $20.81 \pm 0.10$  % with the right hand; there was no  
486 significant difference with  $p=0.46$  (paired one-sided t-test).

487 To get an overview of the significance of single-channel observations, we calculated the  
488 ratio of significant responses within 19 regions of interest (Table 1).

489 **Table 1: Significant error-related 60-90 Hz power modulations in different areas.**

490 For 19 ROIs, the percentages of channels with significant ( $pFDR < 0.05$ ) 60-90 Hz HGB error-related power  
 491 modulations, averaged across the time window from 0 s to 0.6 s after the response (FDR-corrected over  
 492 all channels, as in Fig. 10), are listed together with the total number of channels (n) included per area.

| Area                      | n   | % positive | % negative |
|---------------------------|-----|------------|------------|
| Heschls gyrus             | 2   | 100.00     | 0.00       |
| Lingual gyrus             | 8   | 62.50      | 0.00       |
| Middle frontal gyrus      | 35  | 45.71      | 0.00       |
| Precentral gyrus          | 43  | 44.19      | 0.00       |
| Insular cortex            | 47  | 38.30      | 0.00       |
| Inferior frontal gyrus    | 71  | 33.80      | 0.00       |
| Postcentral gyrus         | 40  | 30.00      | 0.00       |
| Fusiform gyrus            | 39  | 28.21      | 0.00       |
| Middle cingulate cortex   | 4   | 25.00      | 0.00       |
| Supramarginal gyrus       | 25  | 24.00      | 0.00       |
| Inferior temporal gyrus   | 72  | 23.61      | 0.00       |
| Hippocampal area          | 60  | 18.33      | 1.67       |
| Orbitofrontal cortex      | 73  | 17.81      | 0.00       |
| Superior temporal gyrus   | 35  | 17.14      | 0.00       |
| Superior frontal gyrus    | 22  | 13.64      | 4.55       |
| Middle temporal gyrus     | 117 | 12.82      | 0.85       |
| Anterior cingulate cortex | 24  | 8.33       | 0.00       |
| Rolandic operculum        | 25  | 4.00       | 0.00       |
| Precuneus                 | 6   | 0.00       | 0.00       |

493

494 Error-related high-gamma power increases were observed in 18 of the 19 ROIs, with a  
 495 range of 4 % to 100 % of involved electrodes in the different areas. Power decreases  
 496 were only observed in 3 regions, ranging from 0.85 % to 4.55 % of electrodes.

497 We further compared error-related spectral power modulations of nearby intracranial  
 498 EEG and scalp EEG electrodes in the range of the motor cortex (Fig. 11).

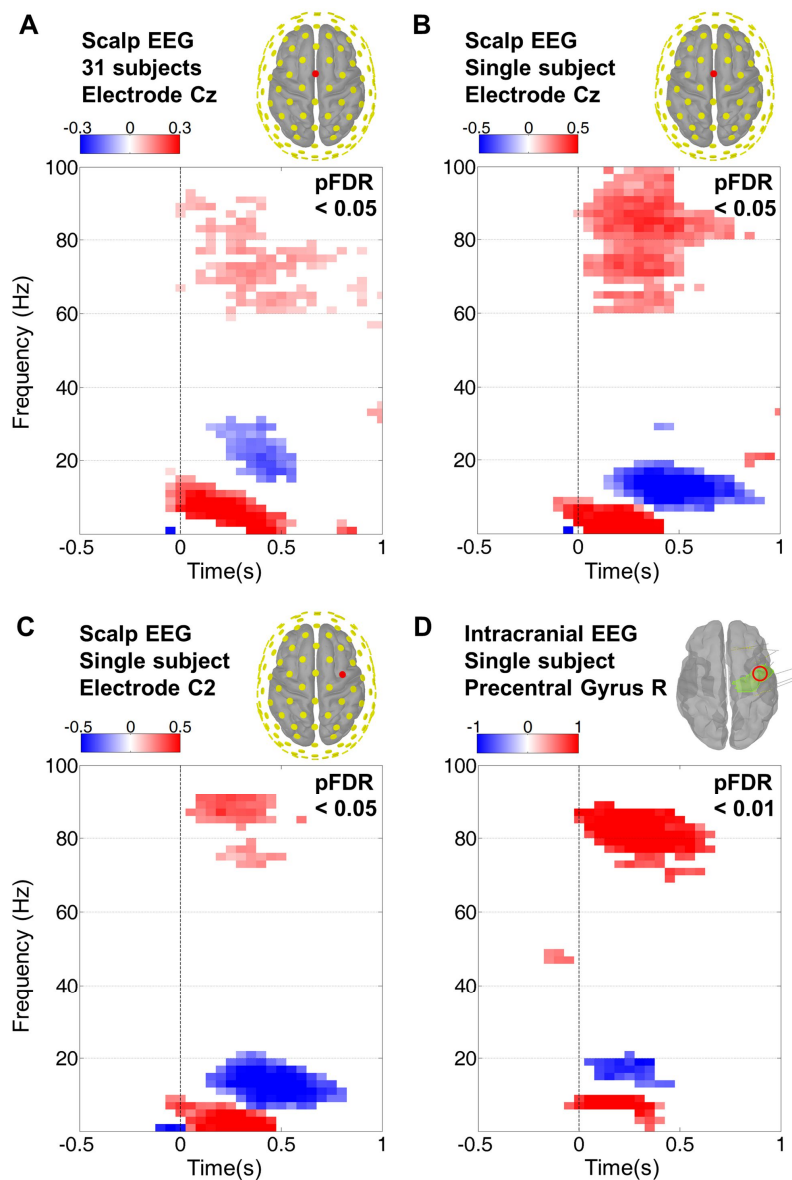

499

500 **Figure 11: Comparison of intracranial EEG with scalp EEG in group and single subject results.**

501 The color scale depicts the logarithmic relative p power of the median error-related response baselined with  
502 the correct response. Only significant power modulations are shown with the threshold as labeled in the  
503 top right corner of the respective plot. Calculation of pFDR-values was done with an FDR-corrected  
504 Wilcoxon rank sum test (single subjects) and an FDR-corrected sign test (group results). **A**) Group median  
505 (31 subjects) of error-related spectral power modulations at electrode Cz. **B**) Single-subject error-related  
506 spectral power modulations in EEG at electrode Cz. **C**) Single-subject error-related spectral power  
507 modulations in EEG at electrode C2. **D**) Single-subject error-related spectral power modulations in  
508 intracranial EEG within the right precentral gyrus in close proximity of the C2 electrode standard position.

509 Both in scalp EEG at central positions and intracranial EEG in the precentral gyrus,  
510 significant error-related power modulations were observed in the delta, theta, alpha,  
511 beta, and high-gamma band. In these examples, the spectral patterns of nearby  
512 intracranial and noninvasive EEG channels were very similar at both group and single-  
513 subject level (Fig. 11). In intracranial EEG, the high-gamma activity had the strongest  
514 error-related power modulation, while in noninvasive measurements, the lower  
515 frequency bands showed a greater difference between correct and error responses.

### 516 **Fine-grained dynamics of error-related activity in intracranial EEG**

517 For a closer look at the spatio-temporal progression of error-related activity across the  
518 brain, we analyzed the time course of error-related low- and high-spectral power  
519 modulations in the intracranially recorded data of all 9 patients (Fig. 12).

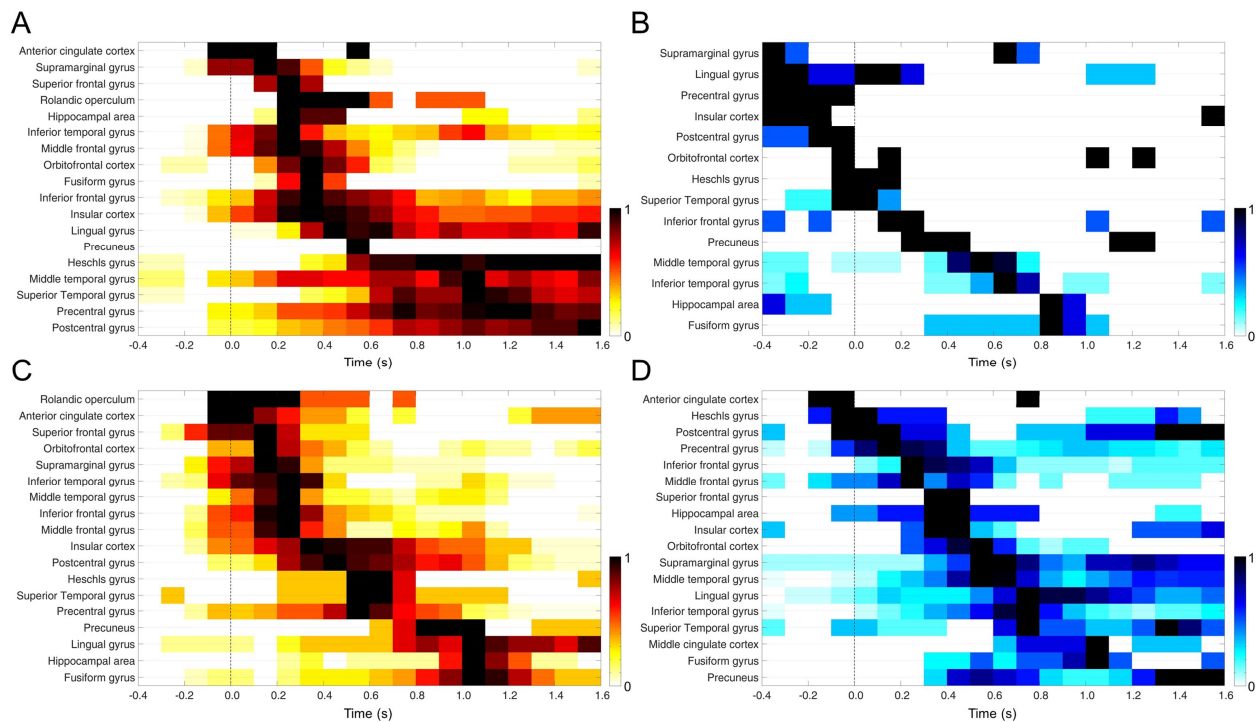

520

521 **Figure 12: Time course of significant error-related power modulations in intracranial EEG.**

522 For each area, the total number of significant increases (red) and decreases (blue) in all patients were  
523 normalized; the areas were sorted according to the time with the maximal count (equal to 1) in ascending  
524 order. Time course of HGB power modulations in the range 50-120 Hz are shown at the top (A, B), low-  
525 frequency components below 30 Hz are shown at the bottom (C, D). The data is aligned to response  
526 onset.

527 It is apparent that low and high frequencies, as well as power increases and decreases,  
528 differed in their spatial distribution over time. Subareas in frontal, temporal, and parietal  
529 brain regions were activated at various time points before, during and after the error  
530 response. Error-related increases in the high-gamma range (Fig. 12 A) especially  
531 exhibited a temporal development that started at frontal surface und deep areas,  
532 including the ACC, and then advanced to both parietal and temporal regions of the  
533 brain. Notably, increased error-related HGB activity in hippocampal areas peaked 0.3 s  
534 after the response, while decreased hippocampal HGB activity (Fig. 12 B) occurred -0.4

535 to -0.2 s before the response and again 0.8 to 1.0 s after the response. Overall,  
536 intracranial EEG portrays a consistent but much more complex picture of error  
537 processing compared to noninvasive data.

## 538 **Discussion**

539 Converging evidence indicates an important role of HGB activity in cortical function  
540 (Başar et al., 2001; Herrmann et al., 2004a; Fries, 2005; Canolty et al., 2006; Crone et  
541 al., 2006; Jensen et al., 2007; Jerbi et al., 2009b; Buzsáki and Wang, 2012). Studies on  
542 human HGB activity were initially restricted to intracranial EEG (Szurhaj and Derambure,  
543 2006; Miller et al., 2007; Whitham et al., 2008). A growing body of literature, however,  
544 indicates that HGB activity can be measured noninvasively using EEG  
545 (Muthukumaraswamy, 2013). HGB activity has been measured noninvasively during  
546 sensory stimulation (Cobb and Dawson, 1960; Heinrich and Bach, 2004; Scheller et al.,  
547 2005), cognitive processing (Friese et al., 2013; Long et al., 2014), executed (Ball et al.,  
548 2008; Darvas et al., 2010; Nottage et al., 2013) and imagined motor tasks (Smith et al.,  
549 2014). This wealth of noninvasive HGB demonstrations underscores that it is in principle  
550 possible to measure HGB activity noninvasively. While error-related HGB activity has  
551 been demonstrated in intracranial EEG (Milekovic et al., 2013; Bastin et al., 2017), here  
552 we show error-related HGB activity noninvasively.

553 In the present study, we examined error processing in the human brain as reflected in  
554 HGB activity, based on measurements using noninvasive and intracranial EEG. In both,  
555 we found significant error-related modulations of high-gamma power. Noninvasive 128-  
556 channel EEG in an electromagnetically shielded cabin enabled us to reveal the global

557 topography and dynamics of event-related potentials and spectral power modulations,  
558 while we used intracranial EEG to validate the noninvasive findings, and additionally to  
559 probe local fine-grained activity patterns.

## 560 **Error-related low-frequency responses in noninvasive EEG**

561 Our findings generally reproduced the spectral power modulations in the delta, theta,  
562 alpha and beta bands in noninvasive EEG as reported by previous studies (Luu et al.,  
563 2004; Yordanova et al., 2004; Kolev et al., 2005; Trujillo and Allen, 2007; Koelewijn et  
564 al., 2008; Carp and Compton, 2009). Further, our results also revealed several  
565 unreported topographical features.

566 For example, we observed an error-related delta band pattern characterized by the co-  
567 occurrence of increased and decreased power in anterior and posterior regions,  
568 respectively (Fig. 4,6). In the high-beta and low-gamma band (20 - 40 Hz), we observed  
569 an error-related power increase in a late time window, starting 800 ms after the  
570 response (Fig. 4,6). Interestingly, around 1000 ms after response onset, a second (with  
571 the ERN/Ne being the first) smaller but significant ( $p < 0.01$ ) negative deflection in the  
572 error-related potential occurred at midline EEG channels (Fig. 4, bottom row) which thus  
573 might be termed “Ne1000”. The maximal low-gamma band response occurred at roughly  
574 the same time with a focus on midline channels. Together, these examples illustrate that  
575 an optimized EEG procedure applied to a suitably large group of subjects can reveal a  
576 range of additional significant features of the error-related response that may be useful  
577 to consider in future studies.

578



579 **Error-related high-frequency responses in noninvasive EEG**

580 Both in group results and single subjects, we found significant error-related HGB power  
581 increases. Although high-gamma activity was seen in both correct and erroneous trials,  
582 it was significantly stronger in the erroneous trials. The error-related high-gamma  
583 response presented itself as an early fronto-central power increase, followed by a shift to  
584 parieto-central areas, where the HGB power after errors was significantly larger than  
585 than after correct responses over an extended period (up to 1.5 s, see Fig. 4,9).  
586 Importantly, the spatio-temporal dynamics differed clearly from those of theta, alpha,  
587 beta, and low-gamma responses, and high-gamma response were not correlated to  
588 ERN/Ne and Pe amplitudes across subjects, pointing to a unique functional role.

589 We controlled thoroughly for ocular artifacts in our noninvasive EEG experiments.  
590 Firstly, by using high-resolution binocular eye tracking, we were able to exactly match  
591 each time bin of the error-related and non-error-related time-frequency-resolved data for  
592 both microsaccade and saccade frequency and thus avoid a differential effect of ocular  
593 potentials (Yuval-Greenberg et al., 2008) on the error-related high-gamma signals.  
594 Secondly, the topography of microsaccade-related HGB effects showed a qualitatively  
595 different spatial pattern compared to the error-related HGB responses (Fig. 7, 8). Thus,  
596 we conclude that our error-related HGB responses cannot be explained as ocular  
597 artifacts.

598 Further, we also think that it is highly unlikely that our error-related HGB responses  
599 reflect EMG contamination. First, the error-related HGB power did not exhibit the rather  
600 flat, broadband power increase typical of EMG contamination (Goncharova et al., 2003),  
601 but rather a strong maximum between 60 and 90 Hz. Second, the spatial distribution of

602 the high-gamma increase with the maximum over the midline differed from that to be  
603 expected for EMG, which has its emphasis on peripheral electrodes close to the  
604 muscles (Goncharova et al., 2003; Whitham et al., 2007).

### 605 **Error-related high-gamma responses in intracranial EEG**

606 Error-related intracranial high-gamma activity was found at multiple locations in the  
607 brain, showing much larger amplitudes than the extracranial counterparts. These areas  
608 overlapped strongly with areas where intracranial error-related potentials and HGB  
609 increases were previously reported (Brázdil et al., 2005; Bastin et al., 2017). In addition  
610 to gamma increases, we also observed responses with a decreased relative high-  
611 gamma power in relation to errors. They often followed a HGB power increase, possibly  
612 representing a systematic suppression aftereffect. As saccadic artifacts in intracranial  
613 EEG are mainly limited to the temporal pole (Jerbi et al., 2009a), our intracranially  
614 recorded error-related HGB increases together with the results reported in 6 patients by  
615 Bastin et al. (2017) clearly show the existence of such responses on the cortex.  
616 Furthermore, as illustrated by Fig. 12, intracranial and scalp EEG channels placed  
617 above central brain regions showed coinciding time-frequency patterns in their error-  
618 related responses (see Fig. 12). Together, these observations lend additional support to  
619 the validity of our noninvasive data. One limitation of such a comparison is, of course,  
620 that not all areas can be observed in noninvasive EEG recordings. While we assume  
621 signals from the hippocampus and insular cortex to be virtually undetectable in  
622 noninvasive EEG, signals from cingular areas might be recordable from the surface (Ball  
623 et al., 1999). Generally, the superficial regions of the cortex areas can be expected to  
624 have a greater influence on the scalp EEG than subcortical areas (Nunez et al., 1997).

625 The time course of intracranial activations (Fig. 13) confirmed that frontal regions were  
626 activated rather early, while parietal (as well as temporal) areas became active later, in  
627 line with a downstream role in error processing. Intracranial data also clearly showed  
628 that, expectedly, cortical error processing is more complex than what can be observed in  
629 noninvasive EEG. Hippocampal high-gamma was significantly decreased prior to the  
630 actual error, and increased after the error. This could signify an interaction of error and  
631 memory systems, consistent with a role of gamma in memory functions (Howard et al.,  
632 2003; Jensen et al., 2007; Sederberg et al., 2007; Kucewicz et al., 2014, 2017).  
633 Furthermore, Fig. 13 also demonstrates that lower HGB power in pre-, postcentral, and  
634 supramarginal gyri as well as the insular cortex may precede errors. One explanation for  
635 that could be that high-gamma power could indicate a pre-activation or “readiness” of a  
636 brain area.

### 637 **Interpretation of high-gamma band activity**

638 Broadband power modulations in intracranial EEG are positively correlated with the local  
639 single-neuron firing rate in humans (Manning et al., 2009) and can be explained by  
640 current models (Bédard et al., 2006; Ray et al., 2008; Miller et al., 2009), which assume  
641 a linear low-pass kernel to quantify the influence of single synaptic events on the  
642 population signal. Insofar as the underlying spiking activity can be assumed to  
643 sufficiently irregular (Softky and Koch, 1993; London et al., 2010), the presynaptic action  
644 potentials can be modeled as a Poisson process, which has a broad spectrum  
645 contributing equally at all frequencies. Some characteristics of the average kernel  
646 proposed in these previous works, such as the cutoff frequency and the order of the low-  
647 pass filtering, have been experimentally investigated (Miller et al., 2009). Our present

648 EEG results are consistent with broadband changes across a wide frequency range (Fig.  
649 2-5), possibly reflecting similar mechanisms as previously described in intracranial data.

650 In addition to broadband changes, inhibitory coupling may lead to gamma oscillations  
651 manifesting in more narrow-banded peaks in different ways. If fluctuations of the  
652 membrane potential are small, e.g., if the neurons are driven tonically, inhibitory  
653 connections can serve to synchronize the activity in the population, leading to regular  
654 and globally synchronous firing (Wang and Buzsáki, 1996; White et al., 1998; Kopell et  
655 al., 2000).

656 In contrast, the mechanism of a collective oscillatory instability relies on inhibitory  
657 feedback arriving with a temporal delay  $d$ ; oscillatory frequencies are in the range of  $\frac{1}{2d}$   
658 and  $\frac{1}{4d}$  (Brunel and Hakim, 1999; Tiesinga and José, 2000), thus well typically in the  
659 high gamma range. The oscillation in these states persists on the population level - it is  
660 manifest in the pairwise correlations between neurons - while single cells exhibit  
661 irregular firing (Brunel and Hakim, 1999; Brunel, 2000; Tiesinga and José, 2000; Brunel  
662 and Wang, 2003).

663 Another network mechanism that can give rise to gamma oscillations relies on the  
664 feedback loop between excitatory (E) and inhibitory (I) neurons (Wilson and Cowan,  
665 1972), requiring a strong coupling from E to I and from I to E (reviewed in Buzsáki and  
666 Wang, 2012). The resulting oscillations in spiking network models are typically in the  
667 lower gamma range (Brunel and Wang, 2003). This mechanism has also been  
668 employed in a non-linear rate model to explain the dependence of gamma oscillation  
669 frequency on the stimulus size in visual cortex, exploiting the modulation of the intra-

670 cortical E-I feedback loop through the neuronal non-linearity (Kang et al., 2010). Notably,  
671 the gamma frequency peak around 80 Hz observed in our data shows a similarity to the  
672 gamma frequency profiles predicted by the model by Brunel (2000, Fig. 9 A).

673 Also, more realistic networks comprised of several layers (Potjans and Diesmann, 2014)  
674 are able to generate an oscillation in the same frequency range: A mean-field analysis  
675 shows that the network mechanism is here a subcircuit comprised of excitatory and  
676 inhibitory neurons in layers 2/3 and 4 (Bos et al., 2016). The mathematical analysis of  
677 these networks also exposes why the power of the oscillation is strongly influenced by  
678 the tonic drive to the network, predominantly to layer 4. An error-related signal changing  
679 the tonic drive to the local oscillation-generating network may thus be a candidate  
680 mechanism behind the observed modulations in the power spectra. Such a mechanism  
681 would predict a co-modulation of the multi-unit firing rate with the increase of gamma  
682 power, as previously empirically observed (Nir et al. 2007) and very much in line with our  
683 observation of a co-occurrence of both, broad band changes and additionally enhanced  
684 gamma power around 80 Hz (Fig 2-5). Thus, a distinction between a broadband  
685 increase of gamma power by the firing rate alone from a modulation of intrinsic  
686 oscillatory properties of the circuit may thus not be as clear cut.

687 From our present results we still cannot draw firm conclusions about the mechanisms  
688 giving rise to the enhanced gamma activity that we have prominently observed around  
689 80 Hz and beyond. To gain such insight in future studies, our noninvasive EEG method  
690 may prove to be a useful tool to study gamma responses and they mechanistic  
691 underpinnings.

692

### 693 **Functional relevance of error-related HGB activity**

694 Our findings reveal sustained, significant HGB activity over the parietal cortex that  
695 substantially outlasted the duration of the Pe, up to at least 1.5 s after response onset.  
696 This raises the question whether this specific timing may hint at a possible functional  
697 role of this late high-gamma response during error processing. Generally, processing of  
698 behavioral errors involves several prominent functional sub-processes. These range  
699 from precursors of error detection, such as the evaluation of actual and intended action  
700 outcomes, including perceptual evidence accumulation, over the explicit error detection  
701 itself, to the evaluation of error importance, error-related learning, and behavioral  
702 adjustment (Holroyd and Coles, 2002; Carbonnell and Falkenstein, 2006; Taylor et al.,  
703 2007). Much research so far has focused on how these processes relate to the ERN/Ne  
704 and Pe complex. Recent evidence, based on systematic reward manipulations that  
705 targeted the criterion which participants used to decide whether or not to report errors,  
706 has linked the Pe to the strength of accumulated error-related evidence (Steinhauser  
707 and Yeung, 2010). Late, sustained parietal high-gamma activity could thus reflect  
708 processes downstream to error evidence accumulations, such as behavioral adjustment  
709 and motor learning. This speculation could be tested in future studies utilizing EEG-  
710 based HGB mapping as described in our present study.

### 711 **Conclusion & Outlook**

712 The fact that error-related HGB signals are detectable with noninvasive EEG opens up a  
713 much wider avenue of research than would be feasible with intracranial recordings  
714 alone, particularly in healthy subjects and also in populations of patients with different  
715 neuropsychiatric disorders, such as social phobias, autism spectrum disorders,

716 schizophrenia, depression, as well as obsessive-compulsive disorder – all of which have  
717 been connected with alterations in the neural response to behavioral errors (Alain et al.,  
718 2002; Hajcak and Simons, 2002; Hajcak et al., 2003; Henderson et al., 2006; Ruchow  
719 et al., 2006; Shiels and Hawk, 2010; Riesel et al., 2011). Implantation of intracranial  
720 electrodes is confined to a much smaller group of patients undergoing pre-neurosurgical  
721 evaluation, in most cases for the treatment of focal pharmaco-resistant epilepsy. Our  
722 findings however clearly highlight the unique value of these intracranial recordings. For  
723 example, they allow assessment of brain structures that are difficult or even impossible  
724 to probe electrophysiologically noninvasively, such as insular cortex and the hippocampal  
725 formation.

726 Our findings could help understanding the mechanisms behind human error processing.  
727 Further, they could also help in the decoding of errors from single-trial EEG using  
728 machine learning algorithms to improve the performance of brain-machine interfacing  
729 (Ferrez and Millan, 2008; Kreilinger et al., 2012; Spüler et al., 2012; Milekovic et al.,  
730 2013; Völker et al., 2017). To dissect underlying mechanisms, an examination of phase-  
731 amplitude coupling between high-gamma power and lower frequency bands (Canolty et  
732 al., 2006; Cohen et al., 2008; Tort et al., 2010; Frieze et al., 2013) during error  
733 processing could provide valuable information. More generally, we suggest that parallel  
734 investigations of error processing with both noninvasive as well as invasive recordings,  
735 and with attention to both classical error-related potentials as well as high-frequency  
736 signatures of error processing, might prove as the most fruitful way towards  
737 understanding the neural basis of this fundamental facet of cognition.

## 738 **References**

- 739 Alain C, McNeely HE, He Y, Christensen BK, West R (2002) Neurophysiological Evidence of  
740 Error-monitoring Deficits in Patients with Schizophrenia. *Cereb Cortex* 12:840–846.
- 741 Albrecht B, Heinrich H, Brandeis D, Uebel H, Yordanova J, Kolev V, Rothenberger A,  
742 Banaschewski T (2009) Flanker-Task in Children. *J Psychophysiol* 23:183–190.
- 743 Amunts K, Schleicher A, Zilles K (2007) Cytoarchitecture of the cerebral cortex—More than  
744 localization. *NeuroImage* 37:1061–1065.
- 745 Ball T, Demandt E, Mutschler I, Neitzel E, Mehring C, Vogt K, Aertsen A, Schulze-Bonhage A  
746 (2008) Movement related activity in the high gamma range of the human EEG.  
747 *NeuroImage* 41:302–310.
- 748 Ball T, Schreiber A, Feige B, Wagner M, Lücking CH, Kristeva-Feige R (1999) The Role of  
749 Higher-Order Motor Areas in Voluntary Movement as Revealed by High-Resolution EEG  
750 and fMRI. *NeuroImage* 10:682–694.
- 751 Başar E, Başar-Eroglu C, Karakaş S, Schürmann M (2001) Gamma, alpha, delta, and theta  
752 oscillations govern cognitive processes. *Int J Psychophysiol* 39:241–248.
- 753 Bastin J, Deman P, David O, Gueguen M, Benis D, Minotti L, Hoffman D, Combrisson E, Kujala  
754 J, Perrone-Bertolotti M, Kahane P, Lachaux J-P, Jerbi K (2017) Direct Recordings from  
755 Human Anterior Insula Reveal its Leading Role within the Error-Monitoring Network.  
756 *Cereb Cortex* 27:1545–1557.
- 757 Bédard C, Kröger H, Destexhe A (2006) Does the 1/f frequency scaling of brain signals reflect  
758 self-organized critical states? *Phys Rev Lett* 97:118102.
- 759 Benjamini Y, Hochberg Y (1995) Controlling the False Discovery Rate: A Practical and  
760 Powerful Approach to Multiple Testing. *J R Stat Soc Ser B Methodol* 57:289–300.
- 761 Bos H, Diesmann M, Helias M (2016) Identifying Anatomical Origins of Coexisting Oscillations  
762 in the Cortical Microcircuit. *PLoS Comput Biol* 12:e1005132.
- 763 Botvinick M, Nystrom LE, Fissell K, Carter CS, Cohen JD (1999) Conflict monitoring versus  
764 selection-for-action in anterior cingulate cortex. *Nature* 402:179–181.
- 765 Brainard DH (1997) The psychophysics toolbox. *Spat Vis* 10:433–436.
- 766 Brázdil M, Roman R, Daniel P, Rektor I (2005) Intracerebral Error-Related Negativity in a  
767 Simple Go/NoGo Task. *J Psychophysiol* 19:244–255.
- 768 Brunel N (2000) Dynamics of sparsely connected networks of excitatory and inhibitory spiking  
769 neurons. *J Comput Neurosci* 8:183–208.



- 770 Brunel N, Hakim V (1999) Fast global oscillations in networks of integrate-and-fire neurons with  
771 low firing rates. *Neural Comput* 11:1621–1671.
- 772 Brunel N, Wang X-J (2003) What Determines the Frequency of Fast Network Oscillations With  
773 Irregular Neural Discharges? I. Synaptic Dynamics and Excitation-Inhibition Balance. *J*  
774 *Neurophysiol* 90:415–430.
- 775 Buzsáki G, Wang X-J (2012) Mechanisms of Gamma Oscillations. *Annu Rev Neurosci* 35:203–  
776 225.
- 777 Canolty RT, Edwards E, Dalal SS, Soltani M, Nagarajan SS, Kirsch HE, Berger MS, Barbaro  
778 NM, Knight RT (2006) High Gamma Power Is Phase-Locked to Theta Oscillations in  
779 Human Neocortex. *Science* 313:1626–1628.
- 780 Carbonnell L, Falkenstein M (2006) Does the error negativity reflect the degree of response  
781 conflict? *Brain Res* 1095:124–130.
- 782 Carp J, Compton RJ (2009) Alpha power is influenced by performance errors. *Psychophysiology*  
783 46:336–343.
- 784 Cobb WA, Dawson GD (1960) The latency and form in man of the occipital potentials evoked by  
785 bright flashes. *J Physiol* 152:108–121.
- 786 Cohen MX, Elger CE, Fell J (2008) Oscillatory Activity and Phase–Amplitude Coupling in the  
787 Human Medial Frontal Cortex during Decision Making. *J Cogn Neurosci* 21:390–402.
- 788 Crone NE, Miglioretti DL, Gordon B, Lesser RP (1998) Functional mapping of human  
789 sensorimotor cortex with electrocorticographic spectral analysis. II. Event-related  
790 synchronization in the gamma band. *Brain J Neurol* 121 ( Pt 12):2301–2315.
- 791 Crone NE, Sinai A, Korzeniewska A (2006) High-frequency gamma oscillations and human  
792 brain mapping with electrocorticography. In: *Progress in Brain Research* (Klimesch CN  
793 and W, ed), pp 275–295 *Event-Related Dynamics of Brain Oscillations*. Elsevier.
- 794 Darvas F, Scherer R, Ojemann JG, Rao RP, Miller KJ, Sorensen LB (2010) High gamma  
795 mapping using EEG. *NeuroImage* 49:930–938.
- 796 Dixon WJ, Mood AM (1946) The Statistical Sign Test. *J Am Stat Assoc* 41:557–566.
- 797 Eickhoff SB, Heim S, Zilles K, Amunts K (2006) Testing anatomically specified hypotheses in  
798 functional imaging using cytoarchitectonic maps. *NeuroImage* 32:570–582.
- 799 Eickhoff SB, Paus T, Caspers S, Grosbras M-H, Evans AC, Zilles K, Amunts K (2007)  
800 Assignment of functional activations to probabilistic cytoarchitectonic areas revisited.  
801 *NeuroImage* 36:511–521.
- 802 Eickhoff SB, Stephan KE, Mohlberg H, Grefkes C, Fink GR, Amunts K, Zilles K (2005) A new  
803 SPM toolbox for combining probabilistic cytoarchitectonic maps and functional imaging  
804 data. *NeuroImage* 25:1325–1335.

- 805 Engbert R, Kliegl R (2003) Microsaccades uncover the orientation of covert attention. *Vision Res*  
806 43:1035–1045.
- 807 Eriksen CW, Eriksen BA (1979) Target redundancy in visual search: Do repetitions of the target  
808 within the display impair processing? *Percept Psychophys* 26:195–205.
- 809 Falkenstein M, Hohnsbein J, Hoormann J, Blanke L (1991) Effects of crossmodal divided  
810 attention on late ERP components. II. Error processing in choice reaction tasks.  
811 *Electroencephalogr Clin Neurophysiol* 78:447–455.
- 812 Ferrez PW, Millan J del R (2008) Error-Related EEG Potentials Generated During Simulated  
813 Brain #x2013;Computer Interaction. *IEEE Trans Biomed Eng* 55:923–929.
- 814 Fonov V, Evans A, McKinstry R, Almlí C, Collins D (2009) Unbiased nonlinear average age-  
815 appropriate brain templates from birth to adulthood. *NeuroImage* 47, Supplement 1:S102.
- 816 Freeman WJ, Rogers LJ, Holmes MD, Silbergeld DL (2000) Spatial spectral analysis of human  
817 electrocorticograms including the alpha and gamma bands. *J Neurosci Methods* 95:111–  
818 121.
- 819 Fries P (2005) A mechanism for cognitive dynamics: neuronal communication through neuronal  
820 coherence. *Trends Cogn Sci* 9:474–480.
- 821 Frieze U, Köster M, Hassler U, Martens U, Trujillo-Barreto N, Gruber T (2013) Successful  
822 memory encoding is associated with increased cross-frequency coupling between frontal  
823 theta and posterior gamma oscillations in human scalp-recorded EEG. *NeuroImage*  
824 66:642–647.
- 825 Gehring WJ, Goss B, Coles MGH, Meyer DE, Donchin E (1993) A Neural System for Error  
826 Detection and Compensation. *Psychol Sci* 4:385–390.
- 827 Gehring WJ, Knight RT (2000) Prefrontal–cingulate interactions in action monitoring. *Nat*  
828 *Neurosci* 3:516–520.
- 829 Goncharova II, McFarland DJ, Vaughan TM, Wolpaw JR (2003) EMG contamination of EEG:  
830 spectral and topographical characteristics. *Clin Neurophysiol* 114:1580–1593.
- 831 Hajcak G, McDonald N, Simons RF (2003) Anxiety and error-related brain activity. *Biol Psychol*  
832 64:77–90.
- 833 Hajcak G, Simons RF (2002) Error-related brain activity in obsessive–compulsive  
834 undergraduates. *Psychiatry Res* 110:63–72.
- 835 Heinrich SP, Bach M (2004) High-frequency oscillations in human visual cortex do not mirror  
836 retinal frequencies. *Neurosci Lett* 369:55–58.
- 837 Henderson H, Schwartz C, Mundy P, Burnette C, Sutton S, Zahka N, Pradella A (2006) Response  
838 monitoring, the error-related negativity, and differences in social behavior in autism.  
839 *Brain Cogn* 61:96–109.

- 840 Herrmann CS, Munk MHJ, Engel AK (2004a) Cognitive functions of gamma-band activity:  
841 memory match and utilization. *Trends Cogn Sci* 8:347–355.
- 842 Herrmann MJ, Römmler J, Ehlis A-C, Heidrich A, Fallgatter AJ (2004b) Source localization  
843 (LORETA) of the error-related-negativity (ERN/Ne) and positivity (Pe). *Cogn Brain Res*  
844 20:294–299.
- 845 Holroyd CB, Coles MGH (2002) The neural basis of human error processing: reinforcement  
846 learning, dopamine, and the error-related negativity. *Psychol Rev* 109:679–709.
- 847 Howard MW, Rizzuto DS, Caplan JB, Madsen JR, Lisman J, Aschenbrenner-Scheibe R, Schulze-  
848 Bonhage A, Kahana MJ (2003) Gamma Oscillations Correlate with Working Memory  
849 Load in Humans. *Cereb Cortex* 13:1369–1374.
- 850 Jensen O, Kaiser J, Lachaux J-P (2007) Human gamma-frequency oscillations associated with  
851 attention and memory. *Trends Neurosci* 30:317–324.
- 852 Jerbi K, Freyermuth S, Dalal S, Kahane P, Bertrand O, Berthoz A, Lachaux J-P (2009a) Saccade  
853 Related Gamma-Band Activity in Intracerebral EEG: Dissociating Neural from Ocular  
854 Muscle Activity. *Brain Topogr* 22:18–23.
- 855 Jerbi K, Ossandón T, Hamamé CM, Senova S, Dalal SS, Jung J, Minotti L, Bertrand O, Berthoz  
856 A, Kahane P, Lachaux J-P (2009b) Task-related gamma-band dynamics from an  
857 intracerebral perspective: Review and implications for surface EEG and MEG. *Hum*  
858 *Brain Mapp* 30:1758–1771.
- 859 Kang K, Shelley M, Henrie JA, Shapley R (2010) LFP spectral peaks in V1 cortex: network  
860 resonance and cortico-cortical feedback. *J Comput Neurosci* 29:495–507.
- 861 Koelewijn T, van Schie HT, Bekkering H, Oostenveld R, Jensen O (2008) Motor-cortical beta  
862 oscillations are modulated by correctness of observed action. *NeuroImage* 40:767–775.
- 863 Kolev V, Falkenstein M, Yordanova J (2005) Aging and error processing - Time-frequency  
864 analysis of error-related potentials. *J Psychophysiol* 19:289–297.
- 865 Kopell N, Ermentrout GB, Whittington MA, Traub RD (2000) Gamma rhythms and beta rhythms  
866 have different synchronization properties. *Proc Natl Acad Sci U S A* 97:1867–1872.
- 867 Kopp B, Rist F, Mattler U (1996) N200 in the flanker task as a neurobehavioral tool for  
868 investigating executive control. *Psychophysiology* 33:282–294.
- 869 Kreilinger A, Neuper C, Müller-Putz GR (2012) Error potential detection during continuous  
870 movement of an artificial arm controlled by brain–computer interface. *Med Biol Eng*  
871 *Comput* 50:223–230.
- 872 Kucewicz MT, Berry BM, Kremen V, Brinkmann BH, Sperling MR, Jobst BC, Gross RE, Lega  
873 B, Sheth SA, Stein JM, Das SR, Gorniak R, Stead SM, Rizzuto DS, Kahana MJ, Worrell  
874 GA (2017) Dissecting gamma frequency activity during human memory processing. *Brain*  
875 140:1337–1350.

- 876 Kucewicz MT, Cimbalnik J, Matsumoto JY, Brinkmann BH, Bower MR, Vasoli V, Sulc V,  
877 Meyer F, Marsh WR, Stead SM, Worrell GA (2014) High frequency oscillations are  
878 associated with cognitive processing in human recognition memory. *Brain* 137:2231–  
879 2244.
- 880 London M, Roth A, Beeren L, Häusser M, Latham PE (2010) Sensitivity to perturbations in vivo  
881 implies high noise and suggests rate coding in cortex. *Nature* 466:123–127.
- 882 Long NM, Burke JF, Kahana MJ (2014) Subsequent memory effect in intracranial and scalp  
883 EEG. *NeuroImage* 84 Available at:  
884 <https://www.ncbi.nlm.nih.gov/pmc/articles/PMC3849113/> [Accessed December 5, 2017].
- 885 Luu P, Tucker DM, Makeig S (2004) Frontal midline theta and the error-related negativity:  
886 neurophysiological mechanisms of action regulation. *Clin Neurophysiol* 115:1821–1835.
- 887 Maier ME, di Pellegrino G, Steinhauser M (2012) Enhanced error-related negativity on flanker  
888 errors: Error expectancy or error significance? *Psychophysiology* 49:899–908.
- 889 Mann HB, Whitney DR (1947) On a Test of Whether one of Two Random Variables is  
890 Stochastically Larger than the Other. *Ann Math Stat* 18:50–60.
- 891 Manning JR, Jacobs J, Fried I, Kahana MJ (2009) Broadband shifts in local field potential power  
892 spectra are correlated with single-neuron spiking in humans. *J Neurosci Off J Soc*  
893 *Neurosci* 29:13613–13620.
- 894 Mazziotta J et al. (2001) A probabilistic atlas and reference system for the human brain:  
895 International Consortium for Brain Mapping (ICBM). *Philos Trans R Soc Lond B Biol*  
896 *Sci* 356:1293–1322.
- 897 Milekovic T, Ball T, Schulze-Bonhage A, Aertsen A, Mehring C (2013) Detection of Error  
898 Related Neuronal Responses Recorded by Electrocorticography in Humans during  
899 Continuous Movements. *PLoS ONE* 8:e55235.
- 900 Miller KJ, denNijs M, Shenoy P, Miller JW, Rao RPN, Ojemann JG (2007) Real-time functional  
901 brain mapping using electrocorticography. *NeuroImage* 37:504–507.
- 902 Miller KJ, Sorensen LB, Ojemann JG, den Nijs M (2009) Power-law scaling in the brain surface  
903 electric potential. *PLoS Comput Biol* 5:e1000609.
- 904 Moore DS, McCabe GP (1989) *Introduction to the practice of statistics*. New York, NY, US: W  
905 H Freeman/Times Books/ Henry Holt & Co.
- 906 Muthukumaraswamy S (2013) High-frequency brain activity and muscle artifacts in MEG/EEG:  
907 A review and recommendations. *Front Hum Neurosci* 7 Available at:  
908 <http://journal.frontiersin.org/article/10.3389/fnhum.2013.00138/abstract> [Accessed  
909 January 2, 2017].

- 910 Nieuwenhuis S, Ridderinkhof KR, Blom J, Band GPH, Kok A (2001) Error-related brain  
911 potentials are differentially related to awareness of response errors: Evidence from an  
912 antisaccade task. *Psychophysiology* 38:752–760.
- 913 Nieuwenhuis S, Ridderinkhof KR, Talsma D, Coles MGH, Holroyd CB, Kok A, Molen MW van  
914 der (2002) A computational account of altered error processing in older age: Dopamine  
915 and the error-related negativity. *Cogn Affect Behav Neurosci* 2:19–36.
- 916 Nottage JF, Morrison PD, Williams SCR, Ffytche DH (2013) A Novel Method for Reducing the  
917 Effect of Tonic Muscle Activity on the Gamma Band of the Scalp EEG. *Brain Topogr*  
918 26:50–61.
- 919 Nunez PL, Srinivasan R, Westdorp AF, Wijesinghe RS, Tucker DM, Silberstein RB, Cadusch PJ  
920 (1997) EEG coherency: I: statistics, reference electrode, volume conduction, Laplacians,  
921 cortical imaging, and interpretation at multiple scales. *Electroencephalogr Clin*  
922 *Neurophysiol* 103:499–515.
- 923 Oldfield RC (1971) The assessment and analysis of handedness: The Edinburgh inventory.  
924 *Neuropsychologia* 9:97–113.
- 925 Pistohl T, Schulze-Bonhage A, Aertsen A, Mehring C, Ball T (2012) Decoding natural grasp  
926 types from human ECoG. *NeuroImage* 59:248–260.
- 927 Potjans TC, Diesmann M (2014) The Cell-Type Specific Cortical Microcircuit: Relating  
928 Structure and Activity in a Full-Scale Spiking Network Model. *Cereb Cortex* 24:785–806.
- 929 Ray S, Crone NE, Niebur E, Franaszczuk PJ, Hsiao SS (2008) Neural correlates of high-gamma  
930 oscillations (60–200 Hz) in macaque local field potentials and their potential implications  
931 in electrocorticography. *J Neurosci Off J Soc Neurosci* 28:11526–11536.
- 932 Ridderinkhof KR, Vlugt Y de, Bramlage A, Spaan M, Elton M, Snel J, Band GPH (2002)  
933 Alcohol Consumption Impairs Detection of Performance Errors in Medial Frontal Cortex.  
934 *Science* 298:2209–2211.
- 935 Riesel A, Endrass T, Kaufmann C, Kathmann N (2011) Overactive Error-Related Brain Activity  
936 as a Candidate Endophenotype for Obsessive-Compulsive Disorder: Evidence From  
937 Unaffected First-Degree Relatives. *Am J Psychiatry* 168:317–324.
- 938 Ruchow M, Herrnberger B, Beschoner P, Grön G, Spitzer M, Kiefer M (2006) Error processing  
939 in major depressive disorder: Evidence from event-related potentials. *J Psychiatr Res*  
940 40:37–46.
- 941 Scheller B, Schneider G, Dauser M, Kochs EF, Zwissler B (2005) High-frequency  
942 Components of Auditory Evoked Potentials Are Detected in Responsive but Not in  
943 Unconscious Patients. *Anesthesiol J Am Soc Anesthesiol* 103:944–950.
- 944 Sederberg PB, Schulze-Bonhage A, Madsen JR, Bromfield EB, McCarthy DC, Brandt A, Tully  
945 MS, Kahana MJ (2007) Hippocampal and Neocortical Gamma Oscillations Predict  
946 Memory Formation in Humans. *Cereb Cortex* 17:1190–1196.

- 947 Shiels K, Hawk LW (2010) Self-regulation in ADHD: The role of error processing. *Clin Psychol*  
948 *Rev* 30:951–961.
- 949 Smith MM, Weaver KE, Grabowski TJ, Rao RPN, Darvas F (2014) Non-invasive detection of  
950 high gamma band activity during motor imagery. *Front Hum Neurosci* 8 Available at:  
951 <http://journal.frontiersin.org/article/10.3389/fnhum.2014.00817/abstract> [Accessed  
952 January 31, 2017].
- 953 Softky WR, Koch C (1993) The highly irregular firing of cortical cells is inconsistent with  
954 temporal integration of random EPSPs. *J Neurosci Off J Soc Neurosci* 13:334–350.
- 955 Spüler M, Bensch M, Kleih S, Rosenstiel W, Bogdan M, Kübler A (2012) Online use of error-  
956 related potentials in healthy users and people with severe motor impairment increases  
957 performance of a P300-BCI. *Clin Neurophysiol* 123:1328–1337.
- 958 Steinhauser M, Yeung N (2010) Decision Processes in Human Performance Monitoring. *J*  
959 *Neurosci* 30:15643–15653.
- 960 Storey JD (2002) A direct approach to false discovery rates. *J R Stat Soc Ser B-Stat Methodol*  
961 64:479–498.
- 962 Storey JD (2003) The positive false discovery rate: a Bayesian interpretation and the q-value.  
963 *Ann Stat* 31:2013–2035.
- 964 Szurhaj W, Derambure P (2006) Intracerebral study of gamma oscillations in the human  
965 sensorimotor cortex. In: *Progress in Brain Research* (Neuper C, Klimesch W, eds), pp  
966 297–310 *Event-Related Dynamics of Brain Oscillations*. Elsevier. Available at:  
967 <http://www.sciencedirect.com/science/article/pii/S007961230659020X>.
- 968 Tadel F, Baillet S, Mosher JC, Pantazis D, Leahy RM (2011) Brainstorm: A User-Friendly  
969 Application for MEG/EEG Analysis. *Comput Intell Neurosci* 2011:e879716.
- 970 Taylor SF, Stern ER, Gehring WJ (2007) Neural Systems for Error Monitoring: Recent Findings  
971 and Theoretical Perspectives. *The Neuroscientist* 13:160–172.
- 972 Thomson DJ (1982) Spectrum estimation and harmonic analysis. *Proc IEEE* 70:1055–1096.
- 973 Tiesinga PHE, José JV (2000) Robust gamma oscillations in networks of inhibitory hippocampal  
974 interneurons. *Netw Comput Neural Syst* 11:1–23.
- 975 Tort ABL, Komorowski R, Eichenbaum H, Kopell N (2010) Measuring Phase-Amplitude  
976 Coupling Between Neuronal Oscillations of Different Frequencies. *J Neurophysiol*  
977 104:1195–1210.
- 978 Trujillo LT, Allen JJB (2007) Theta EEG dynamics of the error-related negativity. *Clin*  
979 *Neurophysiol* 118:645–668.

- 980 Völker M, Schirmeister RT, Fiederer LDJ, Burgard W, Ball T (2017) Deep Transfer Learning  
981 for Error Decoding from Non-Invasive EEG. ArXiv171009139 Cs Q-Bio Available at:  
982 <http://arxiv.org/abs/1710.09139>.
- 983 Wang XJ, Buzsáki G (1996) Gamma oscillation by synaptic inhibition in a hippocampal  
984 interneuronal network model. *J Neurosci Off J Soc Neurosci* 16:6402–6413.
- 985 White JA, Chow CC, Rit J, Soto-Treviño C, Kopell N (1998) Synchronization and Oscillatory  
986 Dynamics in Heterogeneous, Mutually Inhibited Neurons. *J Comput Neurosci* 5:5–16.
- 987 Whitham EM, Lewis T, Pope KJ, Fitzgibbon SP, Clark CR, Loveless S, DeLosAngeles D,  
988 Wallace AK, Broberg M, Willoughby JO (2008) Thinking activates EMG in scalp  
989 electrical recordings. *Clin Neurophysiol* 119:1166–1175.
- 990 Whitham EM, Pope KJ, Fitzgibbon SP, Lewis T, Clark CR, Loveless S, Broberg M, Wallace A,  
991 DeLosAngeles D, Lillie P, Hardy A, Fronsco R, Pulbrook A, Willoughby JO (2007)  
992 Scalp electrical recording during paralysis: Quantitative evidence that EEG frequencies  
993 above 20 Hz are contaminated by EMG. *Clin Neurophysiol* 118:1877–1888.
- 994 Wilson HR, Cowan JD (1972) Excitatory and inhibitory interactions in localized populations of  
995 model neurons. *Biophys J* 12:1–24.
- 996 Yordanova J, Falkenstein M, Hohnsbein J, Kolev V (2004) Parallel systems of error processing in  
997 the brain. *NeuroImage* 22:590–602.
- 998 Yuval-Greenberg S, Tomer O, Keren AS, Nelken I, Deouell LY (2008) Transient Induced  
999 Gamma-Band Response in EEG as a Manifestation of Miniature Saccades. *Neuron*  
1000 58:429–441.
- 1001 Zavala B, Brittain J-S, Jenkinson N, Ashkan K, Foltynie T, Limousin P, Zrinzo L, Green AL,  
1002 Aziz T, Zaghoul K, Brown P (2013) Subthalamic Nucleus Local Field Potential Activity  
1003 during the Eriksen Flanker Task Reveals a Novel Role for Theta Phase during Conflict  
1004 Monitoring. *J Neurosci* 33:14758–14766.
- 1005

1006 **Tables**

1007 **Table 2: Excerpt of studies about error-related spectral power modulations in EEG & MEG.**

1008 As frequency band definitions were not consistent amongst the publications, the respective definition is  
 1009 stated within parentheses.

| Author / year            | Signals          | Error-related spectral modulations                                                                                                                                                        | Paradigm                                                                                                                 |
|--------------------------|------------------|-------------------------------------------------------------------------------------------------------------------------------------------------------------------------------------------|--------------------------------------------------------------------------------------------------------------------------|
| Yordanova et al., 2004   | 64 EEG channels  | <b>Delta (1.5-3.5 Hz)</b> amplitude increase during ERN/Ne component, <b>theta (4-8 Hz)</b> amplitude increase associated with erroneous motor execution.                                 | Four-choice reaction task. 14 subjects (thereof 4 subjects rejected due to too low error rate).                          |
| Luu et al., 2004         | 128 EEG channels | <b>Theta power (4-7 Hz) increase</b> at midfrontal channels, starting with response, ending 400ms after ERN/Ne peak.                                                                      | Forced-choice speeded response paradigm, 11 subjects.                                                                    |
| Kolev et al., 2005       | 64 EEG channels  | Error-specific <b>delta band (1.5-3.5 Hz)</b> power increase and phase locking. <b>Theta power (4-7 Hz) increase</b> after errors in young subjects, not in older subjects.               | Four-choice reaction task. 10 “young” subjects (mean age 22.5±1.5 years), 11 “older” subjects (mean age 58.3±2.1 years). |
| Trujillo and Allen, 2007 | 25 EEG channels  | <b>Theta power (4-7 Hz) increase</b> at midfrontocentral sites, 150ms prior to button press until 400ms after it. Stronger increase in non-phase-locked power than in phase-locked power. | Eriksen flanker task, 21 subjects. Stimuli: ‘SSSSS’, ‘HHHHH’, ‘SSHSS’, and ‘HSHH’                                        |
| Koelewijn et al., 2008   | 151 MEG sensors  | <b>Beta power (15-35 Hz) depression</b> during erroneous task execution, then beta rebound                                                                                                | Motor error observation task. Effect sources identified as dorsal motor areas. 12 subjects (9m, 3f).                     |
| Carp and Compton, 2009   | 8 EEG channels   | <b>Alpha power (10-14 Hz) increase</b> , then decrease in correct trials; absent in erroneous trials.                                                                                     | Stroop task; 81 subjects (46f, 35m).                                                                                     |
